# Supplementary material for: Spleen Tyrosine Kinase–Mediated Autophagy Is Required for Epithelial–Mesenchymal Plasticity and Metastasis in Breast Cancer
Source: Oxford University Press journal article supplement (doi:10.1158/0008-5472.can-18-2636), 2019-02-07
Supplement: 00085472can182636-sup-207536_2_supp_5301230_plqq0h.docx [file 00085472can182636-sup-207536_2_supp_5301230_plqq0h.docx]

**Supplemental Materials:**

**Supplementary Figure 1.**

**
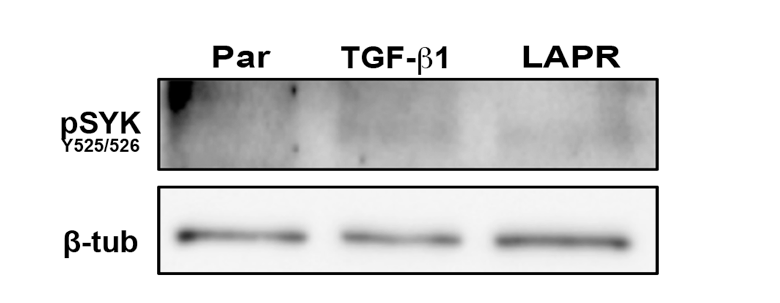
**

**Supplementary Figure 1.** Immunoblot analysis of phosphorylated SYK (pSYK) in HME2 parental, lapatinib resistant (LAPR) and TGF-β treated cells. -tubulin was assessed as a loading control.

**Supplementary Figure 2.**

**
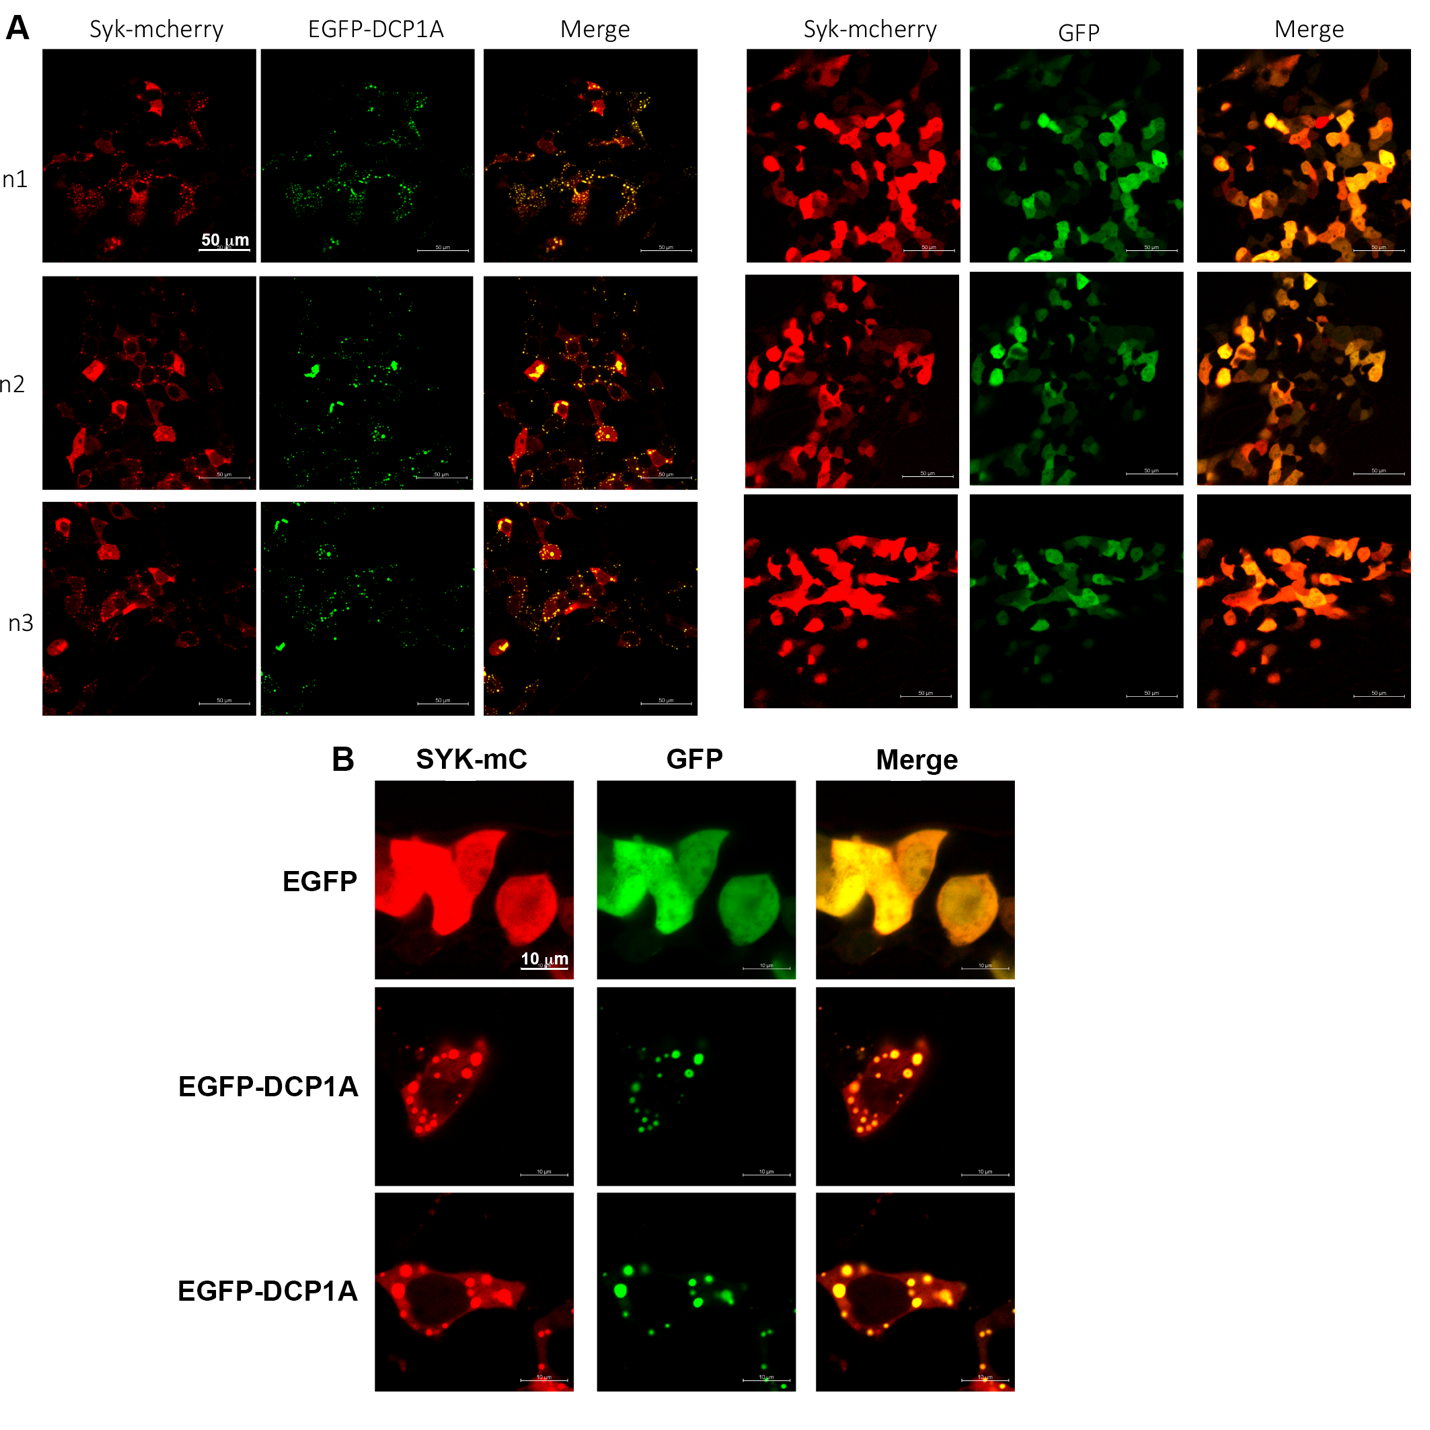
**

**Supplementary Figure 2. SYK colocalizes with DCP1A into P-bodies.** HEK293 cells were transiently transfected with SYK-mCherry (SYK-mC) and EGFP as a control or EGFP-DCP1A to induce P-body formation. Localization of SYK into P-bodies was examined by fluorescence microscopy at 60x (A) with no digital zoom (B) and with a 5x digital zoom. Several fields for each condition are shown.

**Supplementary Figure 3.**


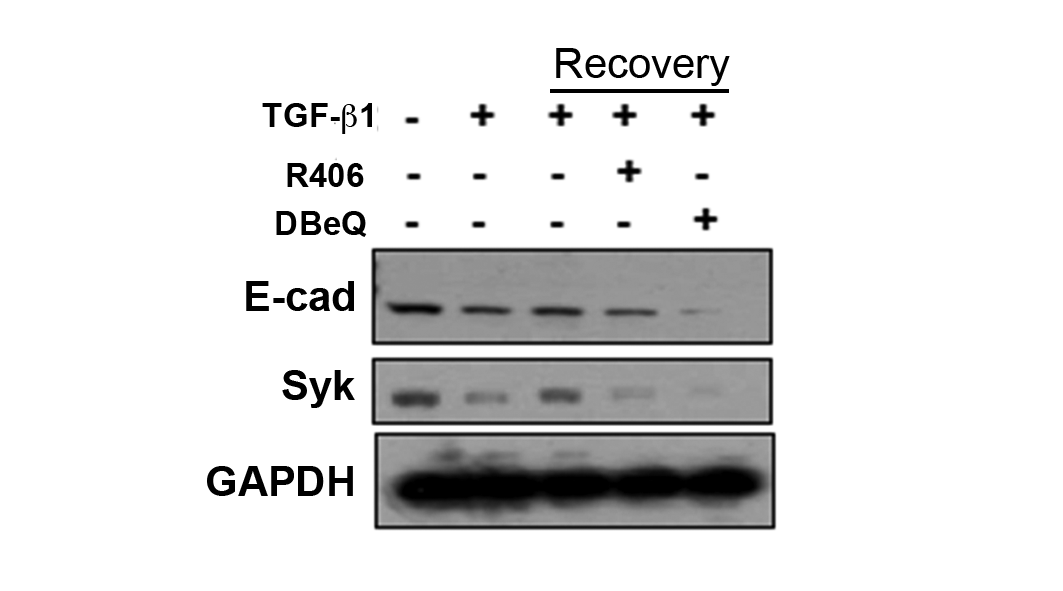


**Supplementary Figure 3.** HMLE cells were treated without (-) or with (+) TGF- for 120 hours. TGF- was removed and cells were allowed to recover (Recovery) in the presence (+) or absence (-) of R406 (2 M) or the autophagy inhibitor DBeQ (1.25 M) for an additional 120 hours. Cell lysates were examined by immunoblotting using antibodies against E-cadherin (E-cad) and SYK. Analysis of GAPDH served as a loading control.

**Supplementary Figure 4.**


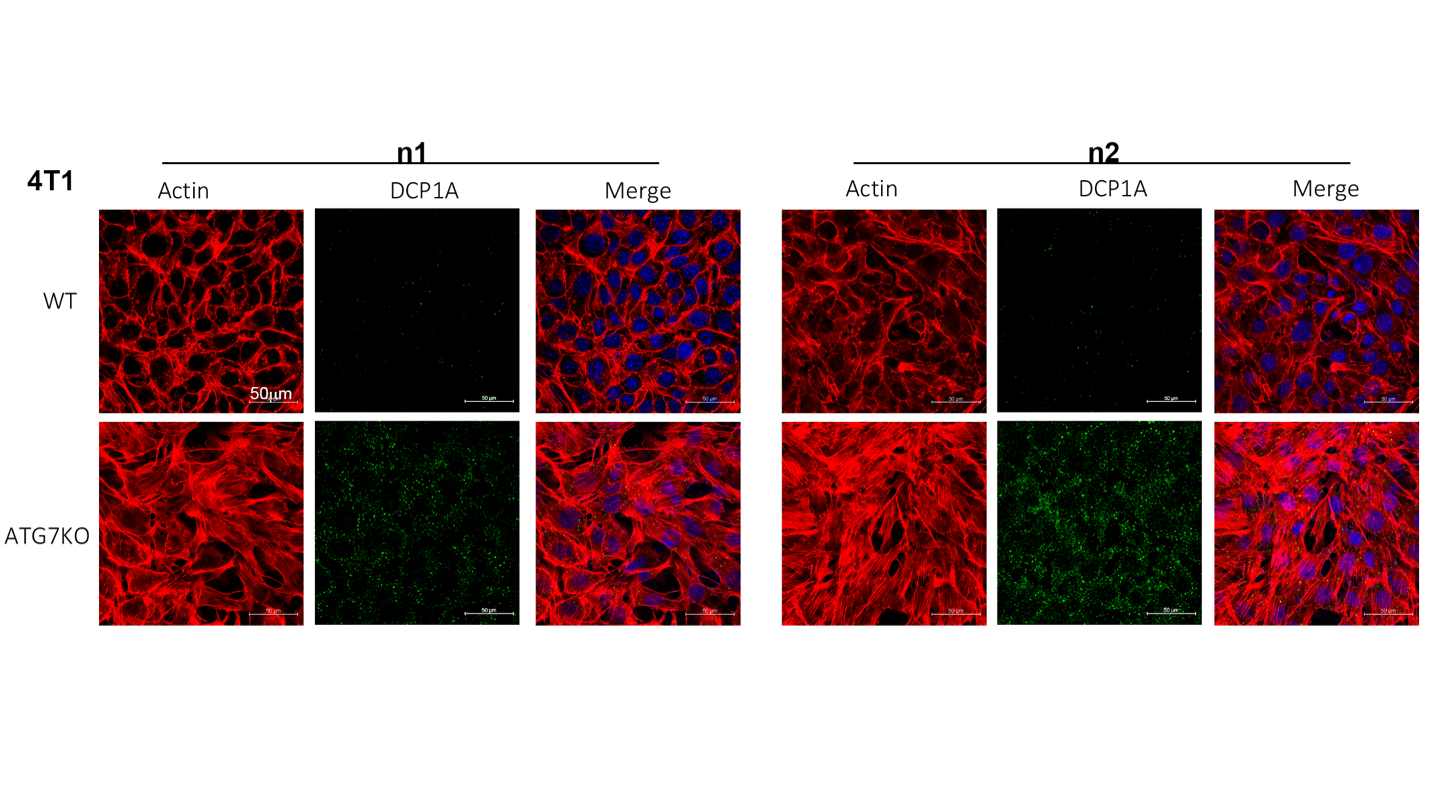


**Supplementary Figure 4. Deletion of ATG7 promotes P-body accumulation and a mesenchymal phenotype.** Control (WT) and ATG7 deleted (ATG7KO) 4T1 cells were stained with phalloidin to visualize differential organization of the actin cytoskeleton and DCP1A to visualize P-bodies. These cells were counterstained with DAPI to visualize the nucleus. Two separate fields for each cell condition are shown.
