# Supplementary material for: Spleen Tyrosine Kinase–Mediated Autophagy Is Required for Epithelial–Mesenchymal Plasticity and Metastasis in Breast Cancer
Source: Oxford University Press journal article supplement (doi:10.1158/0008-5472.can-18-2636), 2019-02-07
Supplement: 00085472can182636-sup-207536_2_supp_5301364_pl1s5d.xlsx [file 00085472can182636-sup-207536_2_supp_5301364_pl1s5d.xlsx]

## Sheet: GO
Supplementary Table 1.
GO analysis for TGF-beta specific gene regultion
GO ID	GO term	Ontology	Observation (n > 2)	Expectation	Enrichment score	raw p-value (Hypergeometric probability)	p-value (Bonferroni)	Genes associated with the GO
GO:0060337	type I interferon signaling pathway	biological_process	12	0.25677	46.7344	1.095e-17	5.48595e-15	/HLA-C/HLA-F/IFI35/IRF7/IRF9/ISG20/OAS1/OAS3/PSMB8/SP100/STAT1/STAT2/
GO:0071357	cellular response to type I interferon	biological_process	12	0.25677	46.7344	1.095e-17	5.48595e-15	/HLA-C/HLA-F/IFI35/IRF7/IRF9/ISG20/OAS1/OAS3/PSMB8/SP100/STAT1/STAT2/
GO:0034340	response to type I interferon	biological_process	12	0.26212	45.7806	1.44381e-17	7.23348e-15	/HLA-C/HLA-F/IFI35/IRF7/IRF9/ISG20/OAS1/OAS3/PSMB8/SP100/STAT1/STAT2/
GO:0019221	cytokine-mediated signaling pathway	biological_process	15	1.23036	12.1916	7.493e-13	3.75399e-10	/B2M/HLA-C/HLA-F/IFI35/IRF7/IRF9/ISG20/OAS1/OAS3/PSMB8/SP100/STAT1/STAT2/UBA7/UBE2L6/
GO:0071346	cellular response to interferon-gamma	biological_process	10	0.337011	29.6726	9.22735e-13	4.6229e-10	/B2M/GBP5/HLA-C/HLA-F/IRF7/IRF9/OAS1/OAS3/SP100/STAT1/
GO:0002376	immune system process	biological_process	27	5.93246	4.55123	2.41621e-12	1.21052e-09	/APOBEC3F/APOBEC3G/B2M/BATF2/BTN3A1/BTN3A2/BTN3A3/COL1A2/CSF1/FCGRT/HLA-C/HLA-F/IRF7/IRF9/ISG20/NLRC5/OAS1/OAS3/PSMB8/PSMB9/SECTM1/STAT1/STAT2/TAP1/TRIM14/UBA7/UBE2L6/
GO:0060333	interferon-gamma-mediated signaling pathway	biological_process	9	0.25677	35.0508	2.79569e-12	1.40064e-09	/B2M/HLA-C/HLA-F/IRF7/IRF9/OAS1/OAS3/SP100/STAT1/
GO:0071345	cellular response to cytokine stimulus	biological_process	16	1.7118	9.34688	6.69468e-12	3.35404e-09	/B2M/GBP5/HLA-C/HLA-F/IFI35/IRF7/IRF9/ISG20/OAS1/OAS3/PSMB8/SP100/STAT1/STAT2/UBA7/UBE2L6/
GO:0006952	defense response	biological_process	22	3.8783	5.67259	7.57035e-12	3.79275e-09	/APOBEC3F/APOBEC3G/APOL2/B2M/BATF2/CSF1/HCP5/HLA-C/IRF7/IRF9/ISG20/LGALS3BP/NLRC5/NMI/OAS1/OAS3/STAT1/STAT2/TAP1/TRIM14/UBA7/UBE2L6/
GO:0034341	response to interferon-gamma	biological_process	10	0.417252	23.9663	8.48543e-12	4.2512e-09	/B2M/GBP5/HLA-C/HLA-F/IRF7/IRF9/OAS1/OAS3/SP100/STAT1/
GO:0034097	response to cytokine	biological_process	16	2.10231	7.61069	1.42367e-10	7.1326e-08	/B2M/GBP5/HLA-C/HLA-F/IFI35/IRF7/IRF9/ISG20/OAS1/OAS3/PSMB8/SP100/STAT1/STAT2/UBA7/UBE2L6/
GO:0048525	negative regulation of viral process	biological_process	8	0.304915	26.2368	5.59193e-10	2.80156e-07	/APOBEC3F/APOBEC3G/ISG20/OAS1/OAS3/PARP10/SP100/TRIM14/
GO:0009615	response to virus	biological_process	11	0.898696	12.24	1.10881e-09	5.55511e-07	/APOBEC3F/APOBEC3G/IFI44/IRF7/IRF9/ISG20/NLRC5/OAS1/OAS3/STAT1/STAT2/
GO:0051704	multi-organism process	biological_process	21	4.777	4.39607	2.70816e-09	1.35679e-06	/APOBEC3F/APOBEC3G/B2M/BATF2/CITED2/FDPS/HLA-C/IFI44/IRF7/IRF9/ISG20/NLRC5/OAS1/OAS3/PSMB8/PSMB9/SP100/SP110/STAT1/STAT2/TAP1/
GO:0051607	defense response to virus	biological_process	9	0.556336	16.1773	3.53253e-09	1.7698e-06	/APOBEC3F/APOBEC3G/IRF9/ISG20/NLRC5/OAS1/OAS3/STAT1/STAT2/
GO:0050896	response to stimulus	biological_process	45	22.1785	2.02899	4.76744e-09	2.38849e-06	/APOBEC3F/APOBEC3G/APOL2/B2M/BATF2/BTN3A1/BTN3A2/BTN3A3/CITED2/COL1A2/CSF1/CYR61/DKK1/FCGRT/GBP5/HCP5/HLA-C/HLA-F/IFI35/IFI44/IRF7/IRF9/ISG20/LGALS3BP/LY6E/MOK/NLRC5/NMI/OAS1/OAS3/PADI2/PILRB/PSMB8/PSMB9/RCAN2/SECTM1/SP100/SP110/STAT1/STAT2/TAP1/TRIM14/UBA7/UBE2L6/VASN/
GO:0043901	negative regulation of multi-organism process	biological_process	8	0.401204	19.94	5.24454e-09	2.62751e-06	/APOBEC3F/APOBEC3G/ISG20/OAS1/OAS3/PARP10/SP100/TRIM14/
GO:0051707	response to other organism	biological_process	12	1.36944	8.7627	7.99269e-09	4.00434e-06	/APOBEC3F/APOBEC3G/BATF2/IFI44/IRF7/IRF9/ISG20/NLRC5/OAS1/OAS3/STAT1/STAT2/
GO:0098542	defense response to other organism	biological_process	10	0.887997	11.2613	1.49793e-08	7.50464e-06	/APOBEC3F/APOBEC3G/BATF2/IRF9/ISG20/NLRC5/OAS1/OAS3/STAT1/STAT2/
GO:0002252	immune effector process	biological_process	12	1.44968	8.27768	1.5025e-08	7.52751e-06	/APOBEC3F/APOBEC3G/BTN3A2/BTN3A3/IRF7/IRF9/ISG20/NLRC5/OAS1/OAS3/STAT1/STAT2/
GO:0045071	negative regulation of viral genome replication	biological_process	6	0.17653	33.9886	1.78989e-08	8.96736e-06	/APOBEC3F/APOBEC3G/ISG20/OAS1/OAS3/PARP10/
GO:0006955	immune response	biological_process	17	3.51454	4.83704	3.18128e-08	1.59382e-05	/APOBEC3F/APOBEC3G/B2M/BTN3A2/BTN3A3/CSF1/FCGRT/HLA-C/HLA-F/IRF7/NLRC5/OAS1/OAS3/SECTM1/TRIM14/UBA7/UBE2L6/
GO:0043207	response to external biotic stimulus	biological_process	13	2.04346	6.36175	7.76172e-08	3.88862e-05	/APOBEC3F/APOBEC3G/B2M/BATF2/IFI44/IRF7/IRF9/ISG20/NLRC5/OAS1/OAS3/STAT1/STAT2/
GO:0009607	response to biotic stimulus	biological_process	13	2.1344	6.0907	1.27949e-07	6.41026e-05	/APOBEC3F/APOBEC3G/B2M/BATF2/IFI44/IRF7/IRF9/ISG20/NLRC5/OAS1/OAS3/STAT1/STAT2/
GO:0045069	regulation of viral genome replication	biological_process	6	0.25677	23.3672	1.84327e-07	9.23481e-05	/APOBEC3F/APOBEC3G/ISG20/OAS1/OAS3/PARP10/
GO:0006950	response to stress	biological_process	27	10.0354	2.69047	2.65855e-07	0.000133193	/APOBEC3F/APOBEC3G/APOL2/B2M/BATF2/CITED2/CSF1/HCP5/HLA-C/IRF7/IRF9/ISG20/LGALS3BP/NLRC5/NMI/OAS1/OAS3/PSMB8/PSMB9/SP100/STAT1/STAT2/TAP1/TRIM14/UBA7/UBE2L6/VASN/
GO:0050792	regulation of viral process	biological_process	8	0.668673	11.964	2.88603e-07	0.00014459	/APOBEC3F/APOBEC3G/ISG20/OAS1/OAS3/PARP10/SP100/TRIM14/
GO:0043903	regulation of symbiosis, encompassing mutualism through parasitism	biological_process	8	0.727516	10.9963	5.48095e-07	0.000274596	/APOBEC3F/APOBEC3G/ISG20/OAS1/OAS3/PARP10/SP100/TRIM14/
GO:0002479	antigen processing and presentation of exogenous peptide antigen via MHC class I, TAP-dependent	biological_process	6	0.358409	16.7407	1.36619e-06	0.000684462	/B2M/HLA-C/HLA-F/PSMB8/PSMB9/TAP1/
GO:0007166	cell surface receptor signaling pathway	biological_process	22	7.55333	2.91262	1.45788e-06	0.000730397	/B2M/BTN3A1/CITED2/COL1A2/DKK1/FCGRT/HLA-C/HLA-F/IFI35/IRF7/IRF9/ISG20/LY6E/OAS1/OAS3/PILRB/PSMB8/SP100/STAT1/STAT2/UBA7/UBE2L6/
GO:0042590	antigen processing and presentation of exogenous peptide antigen via MHC class I	biological_process	6	0.374457	16.0232	1.76884e-06	0.000886186	/B2M/HLA-C/HLA-F/PSMB8/PSMB9/TAP1/
GO:0043900	regulation of multi-organism process	biological_process	9	1.16616	7.7176	1.95701e-06	0.00098046	/APOBEC3F/APOBEC3G/B2M/ISG20/OAS1/OAS3/PARP10/SP100/TRIM14/
GO:0001916	positive regulation of T cell mediated cytotoxicity	biological_process	4	0.101638	39.3553	2.67643e-06	0.00134089	/B2M/HLA-C/HLA-F/TAP1/
GO:0001914	regulation of T cell mediated cytotoxicity	biological_process	4	0.112337	35.6071	4.0913e-06	0.00204974	/B2M/HLA-C/HLA-F/TAP1/
GO:0060338	regulation of type I interferon-mediated signaling pathway	biological_process	4	0.117686	33.9886	4.97536e-06	0.00249266	/IRF7/NLRC5/STAT1/STAT2/
GO:0007165	signal transduction	biological_process	30	13.9619	2.14871	5.1666e-06	0.00258846	/B2M/BTN3A1/CITED2/COL1A2/DKK1/FCGRT/HLA-C/HLA-F/IFI35/IRF7/IRF9/ISG20/LGALS3BP/LY6E/MOK/NMI/OAS1/OAS3/PADI2/PILRB/PSMB8/PSMB9/RCAN2/SECTM1/SP100/SP110/STAT1/STAT2/UBA7/UBE2L6/
GO:0002480	antigen processing and presentation of exogenous peptide antigen via MHC class I, TAP-independent	biological_process	3	0.042795	70.1016	7.97031e-06	0.00399313	/B2M/HLA-C/HLA-F/
GO:0046977	TAP binding	molecular_function	3	0.042795	70.1016	7.97031e-06	0.00399313	/HLA-C/HLA-F/TAP1/
GO:0002474	antigen processing and presentation of peptide antigen via MHC class I	biological_process	6	0.486794	12.3255	8.11434e-06	0.00406529	/B2M/HLA-C/HLA-F/PSMB8/PSMB9/TAP1/
GO:0001912	positive regulation of leukocyte mediated cytotoxicity	biological_process	4	0.133735	29.91	8.47496e-06	0.00424596	/B2M/HLA-C/HLA-F/TAP1/
GO:0009605	response to external stimulus	biological_process	15	4.19926	3.57205	9.60769e-06	0.00481345	/APOBEC3F/APOBEC3G/B2M/BATF2/CITED2/CYR61/IFI44/IRF7/IRF9/ISG20/NLRC5/OAS1/OAS3/STAT1/STAT2/
GO:0071310	cellular response to organic substance	biological_process	18	6.00736	2.99633	1.16079e-05	0.00581555	/B2M/CITED2/COL1A2/GBP5/HLA-C/HLA-F/IFI35/IRF7/IRF9/ISG20/OAS1/OAS3/PSMB8/SP100/STAT1/STAT2/UBA7/UBE2L6/
GO:0031343	positive regulation of cell killing	biological_process	4	0.149783	26.7054	1.35116e-05	0.0067693	/B2M/HLA-C/HLA-F/TAP1/
GO:0001910	regulation of leukocyte mediated cytotoxicity	biological_process	4	0.155132	25.7845	1.55947e-05	0.00781292	/B2M/HLA-C/HLA-F/TAP1/
GO:0002711	positive regulation of T cell mediated immunity	biological_process	4	0.155132	25.7845	1.55947e-05	0.00781292	/B2M/HLA-C/HLA-F/TAP1/
GO:0042612	MHC class I protein complex	cellular_component	3	0.053494	56.0812	1.69054e-05	0.00846961	/B2M/HLA-C/HLA-F/
GO:0002682	regulation of immune system process	biological_process	14	3.96924	3.52712	2.27644e-05	0.011405	/APOBEC3F/APOBEC3G/B2M/BTN3A1/CSF1/FCGRT/HLA-C/HLA-F/IRF7/NLRC5/PADI2/STAT1/STAT2/TAP1/
GO:0070887	cellular response to chemical stimulus	biological_process	19	6.97024	2.72587	2.32772e-05	0.0116619	/B2M/CITED2/COL1A2/GBP5/HLA-C/HLA-F/IFI35/IRF7/IRF9/ISG20/OAS1/OAS3/PSMB8/SP100/STAT1/STAT2/UBA7/UBE2L6/VASN/
GO:0016032	viral process	biological_process	12	2.95821	4.05651	2.49143e-05	0.012482	/APOBEC3G/B2M/FDPS/HLA-C/IRF7/PSMB8/PSMB9/SP100/SP110/STAT1/STAT2/TAP1/
GO:0044403	symbiosis, encompassing mutualism through parasitism	biological_process	12	2.95821	4.05651	2.49143e-05	0.012482	/APOBEC3G/B2M/FDPS/HLA-C/IRF7/PSMB8/PSMB9/SP100/SP110/STAT1/STAT2/TAP1/
GO:0031341	regulation of cell killing	biological_process	4	0.17653	22.6591	2.63313e-05	0.013192	/B2M/HLA-C/HLA-F/TAP1/
GO:0044764	multi-organism cellular process	biological_process	12	2.9796	4.02738	2.66963e-05	0.0133749	/APOBEC3G/B2M/FDPS/HLA-C/IRF7/PSMB8/PSMB9/SP100/SP110/STAT1/STAT2/TAP1/
GO:0001959	regulation of cytokine-mediated signaling pathway	biological_process	5	0.363758	13.7454	2.84933e-05	0.0142752	/IRF7/NLRC5/PADI2/STAT1/STAT2/
GO:0002819	regulation of adaptive immune response	biological_process	5	0.363758	13.7454	2.84933e-05	0.0142752	/B2M/HLA-C/HLA-F/IRF7/TAP1/
GO:0002709	regulation of T cell mediated immunity	biological_process	4	0.181879	21.9926	2.96921e-05	0.0148758	/B2M/HLA-C/HLA-F/TAP1/
GO:0002708	positive regulation of lymphocyte mediated immunity	biological_process	4	0.197927	20.2095	4.16503e-05	0.0208668	/B2M/HLA-C/HLA-F/TAP1/
GO:0060759	regulation of response to cytokine stimulus	biological_process	5	0.395854	12.6309	4.27373e-05	0.0214114	/IRF7/NLRC5/PADI2/STAT1/STAT2/
GO:0002705	positive regulation of leukocyte mediated immunity	biological_process	4	0.203276	19.6776	4.63162e-05	0.0232044	/B2M/HLA-C/HLA-F/TAP1/
GO:0002824	positive regulation of adaptive immune response based on somatic recombination of immune receptors built from immunoglobulin superfamily domains	biological_process	4	0.203276	19.6776	4.63162e-05	0.0232044	/B2M/HLA-C/HLA-F/TAP1/
GO:0019882	antigen processing and presentation	biological_process	7	0.989636	7.07331	4.97761e-05	0.0249378	/B2M/FCGRT/HLA-C/HLA-F/PSMB8/PSMB9/TAP1/
GO:0044419	interspecies interaction between organisms	biological_process	12	3.23638	3.70785	5.83374e-05	0.029227	/APOBEC3G/B2M/FDPS/HLA-C/IRF7/PSMB8/PSMB9/SP100/SP110/STAT1/STAT2/TAP1/
GO:0002821	positive regulation of adaptive immune response	biological_process	4	0.219325	18.2378	6.25888e-05	0.031357	/B2M/HLA-C/HLA-F/TAP1/
GO:0003823	antigen binding	molecular_function	4	0.240722	16.6167	9.02449e-05	0.0452127	/FCGRT/HLA-C/HLA-F/TAP1/
GO:0051716	cellular response to stimulus	biological_process	32	17.9365	1.78407	9.96301e-05	0.0499147	/B2M/BTN3A1/CITED2/COL1A2/DKK1/FCGRT/GBP5/HLA-C/HLA-F/IFI35/IRF7/IRF9/ISG20/LGALS3BP/LY6E/MOK/NMI/OAS1/OAS3/PADI2/PILRB/PSMB8/PSMB9/RCAN2/SECTM1/SP100/SP110/STAT1/STAT2/UBA7/UBE2L6/VASN/
