# Supplementary material for: Spleen Tyrosine Kinase–Mediated Autophagy Is Required for Epithelial–Mesenchymal Plasticity and Metastasis in Breast Cancer
Source: Oxford University Press journal article supplement (doi:10.1158/0008-5472.can-18-2636), 2019-02-07
Supplement: 00085472can182636-sup-207536_2_supp_data_5301232_pl1q01.xlsx [file 00085472can182636-sup-207536_2_supp_data_5301232_pl1q01.xlsx]

## Sheet: PTK Log2
Supplementary Table 2. Kinome Screening results for Tyrorsine continaining peptides
Description	ID	UniprotAccession	Peptide Sequence	Tyr	Paental	Parental	Parental	LapR	LapR	LapR	Post-TGF	Post-TGF	Post-TGF
Calmodulin (CaM).	CALM_93_105	P62158	FDKDGNGYISAAE	[100]	0	0	0	0	0	0	0	0	0
Calmodulin (CaM).	CALM_95_107	P62158	KDGNGYISAAELR	[100]	5.24649	5.02027	5.24578	5.09465	4.98116	4.97771	3.17596	3.70879	3.12695
Beta-type platelet-derived growth factor receptor precursor(EC 2.7.10.1) (PDGF-R-beta) (CD140b antigen).	PGFRB_1002_1014	P09619	LDTSSVLYTAVQP	[1009]	6.2986	6.18497	5.82715	6.70879	6.82691	6.58496	5.28331	5.41801	5.73356
Beta-type platelet-derived growth factor receptor precursor(EC 2.7.10.1) (PDGF-R-beta) (CD140b antigen).	PGFRB_1014_1028	P09619	PNEGDNDYIIPLPDP	[1021]	7.22954	7.59753	7.02551	7.53682	8.09843	7.6648	6.38289	6.44106	6.61137
Tyrosine-protein kinase JAK1 (EC 2.7.10.2) (Janus kinase 1) (JAK-1).	JAK1_1015_1027	P23458	AIETDKEYYTVKD	[1022, 1023]	6.25899	6.577	6.35256	6.8971	7.57014	7.15568	5.81608	6.03819	5.7927
Proto-oncogene tyrosine-protein kinase receptor ret precursor(EC 2.7.10.1) (C-ret).	RET_1022_1034	P07949	TPSDSLIYDDGLS	[1029]	7.80881	7.78729	7.56569	8.4948	9.11997	8.68987	7.22355	7.31134	7.31784
Vascular endothelial growth factor receptor 1 precursor (EC 2.7.10.1)(VEGFR-1) (Vascular permeability factor receptor) (Tyrosine-proteinkinase receptor FLT) (Flt-1) (Tyrosine-protein kinase FRT) (Fms-liketyrosine kinase 1).	VGFR1_1040_1052	P17948	DFGLARDIYKNPD	[1048]	4.22336	4.24936	4.43573	4.51406	4.65794	4.51763	2.37011	3.31647	3.5033
Vascular endothelial growth factor receptor 1 precursor (EC 2.7.10.1)(VEGFR-1) (Vascular permeability factor receptor) (Tyrosine-proteinkinase receptor FLT) (Flt-1) (Tyrosine-protein kinase FRT) (Fms-liketyrosine kinase 1).	VGFR1_1046_1058_Y1048F	P17948	DIFKNPDYVRKGD	[1053]	0	0	0	0	0	0	0	0	0
Vascular endothelial growth factor receptor 1 precursor (EC 2.7.10.1)(VEGFR-1) (Vascular permeability factor receptor) (Tyrosine-proteinkinase receptor FLT) (Flt-1) (Tyrosine-protein kinase FRT) (Fms-liketyrosine kinase 1).	VGFR1_1049_1061	P17948	KNPDYVRKGDTRL	[1053]	2.90507	2.54354	3.22336	4.1207	4.44576	3.49125	1.05344	0.520007	2.74375
Vascular endothelial growth factor receptor 2 precursor (EC 2.7.10.1)(VEGFR-2) (Kinase insert domain receptor) (Protein-tyrosine kinasereceptor Flk-1) (CD309 antigen).	VGFR2_1052_1064	P35968	DIYKDPDYVRKGD	[1054, 1059]	4.84099	4.77292	4.73969	5.09624	5.21606	5.43573	3.58949	4.10813	4.20134
Vascular endothelial growth factor receptor 2 precursor (EC 2.7.10.1)(VEGFR-2) (Kinase insert domain receptor) (Protein-tyrosine kinasereceptor Flk-1) (CD309 antigen).	VGFR2_1046_1058	P35968	DFGLARDIYKDPD	[1054]	3.98461	4.07621	3.86267	4.3055	4.43573	4.42436	3.5482	3.39361	2.97252
Vascular endothelial growth factor receptor 3 precursor (EC 2.7.10.1)(VEGFR-3) (Tyrosine-protein kinase receptor FLT4).	VGFR3_1061_1073	P35916	DIYKDPDYVRKGS	[1063, 1068]	4.40522	3.71916	4.3055	4.53769	5.0303	4.95858	2.68993	3.63183	3.83623
Epidermal growth factor receptor precursor (EC 2.7.10.1) (Receptortyrosine-protein kinase ErbB-1).	EGFR_1062_1074	P00533	EDSFLQRYSSDPT	[1069]	0	0	0	0	0	0	0	0	0
Retinoblastoma-like protein 2 (130 kDa retinoblastoma-associatedprotein) (p130) (PRB2) (RBR-2).	RBL2_99_111	Q08999	VPTVSKGTVEGNY	[111]	3.23498	2.40136	2.5621	2.82667	0	2.57586	0	1.23786	0.0794345
Epidermal growth factor receptor precursor (EC 2.7.10.1) (Receptortyrosine-protein kinase ErbB-1).	EGFR_1103_1115	P00533	GSVQNPVYHNQPL	[1110]	5.57871	5.73254	5.78581	6.23498	6.87594	6.42753	5.23786	5.57415	5.18047
Neuronal migration protein doublecortin (Lissencephalin-X) (Lis-X)(Doublin).	DCX_109_121	O43602	GIVYAVSSDRFRS	[112]	6.75413	6.8317	6.89047	7.1486	7.65551	7.35639	5.93252	6.26643	6.4351
Epidermal growth factor receptor precursor (EC 2.7.10.1) (Receptortyrosine-protein kinase ErbB-1).	EGFR_1118_1130	P00533	APSRDPHYQDPHS	[1125]	3.78185	3.01355	3.93208	4.56785	1.70671	4.31511	2.442	3.41674	1.84194
Vascular endothelial growth factor receptor 1 precursor (EC 2.7.10.1)(VEGFR-1) (Vascular permeability factor receptor) (Tyrosine-proteinkinase receptor FLT) (Flt-1) (Tyrosine-protein kinase FRT) (Fms-liketyrosine kinase 1).	VGFR1_1162_1174	P17948	VQQDGKDYIPINA	[1169]	0	0	0	0	0	0	0	0	0
Epidermal growth factor receptor precursor (EC 2.7.10.1) (Receptortyrosine-protein kinase ErbB-1).	EGFR_1165_1177	P00533	ISLDNPDYQQDFF	[1172]	4.28749	4.23931	3.82283	4.39232	5.05016	4.4997	1.33817	2.51048	2.5667
Vascular endothelial growth factor receptor 2 precursor (EC 2.7.10.1)(VEGFR-2) (Kinase insert domain receptor) (Protein-tyrosine kinasereceptor Flk-1) (CD309 antigen).	VGFR2_1168_1180	P35968	AQQDGKDYIVLPI	[1175]	5.66279	5.85939	5.49548	5.93786	5.62081	5.79858	4.1486	4.51406	4.57243
Paxillin.	PAXI_111_123	P49023	VGEEEHVYSFPNK	[118]	9.57825	9.64297	9.39365	10.6424	10.8194	10.4632	9.47699	9.48875	9.50738
Receptor tyrosine-protein kinase erbB-4 precursor (EC 2.7.10.1)(p180erbB4) (Tyrosine kinase-type cell surface receptor HER4).	ERBB4_1181_1193	Q15303	QALDNPEYHNASN	[1188]	2.32736	3.53182	1.93742	1.86454	2.41674	2.32193	0	0	0
Epidermal growth factor receptor precursor (EC 2.7.10.1) (Receptortyrosine-protein kinase ErbB-1).	EGFR_1190_1202	P00533	STAENAEYLRVAP	[1197]	4.75791	5.22991	4.63621	4.33007	4.51525	3.66654	1.442	1.3055	2.9445
Glutamyl aminopeptidase (EC 3.4.11.7) (EAP) (Aminopeptidase A) (APA)(Differentiation antigen gp160) (CD249 antigen).	AMPE_5_17	Q07075	EREGSKRYCIQTK	[12]	4.116	2.49125	2.17295	3.6097	3.71295	4.22773	3.42943	3.12383	2.98289
Vascular endothelial growth factor receptor 1 precursor (EC 2.7.10.1)(VEGFR-1) (Vascular permeability factor receptor) (Tyrosine-proteinkinase receptor FLT) (Flt-1) (Tyrosine-protein kinase FRT) (Fms-liketyrosine kinase 1).	VGFR1_1206_1218	P17948	GSSDDVRYVNAFK	[1213]	2.69834	2.33817	1.93742	2.05344	2.87941	1.57586	1.64712	0	1.3489
Vascular endothelial growth factor receptor 2 precursor (EC 2.7.10.1)(VEGFR-2) (Kinase insert domain receptor) (Protein-tyrosine kinasereceptor Flk-1) (CD309 antigen).	VGFR2_1207_1219_C1208S	P35968	VSDPKFHYDNTAG	[1214]	0	0	0	0	0	0	0	0	0
T-cell surface glycoprotein CD3 zeta chain precursor (T-cell receptorT3 zeta chain) (CD247 antigen).	CD3Z_116_128	P20963	KDKMAEAYSEIGM	[123]	5.44326	5.51882	5.38647	6.14975	6.44701	6.2682	4.95507	5.07782	4.30963
Hepatocyte growth factor receptor precursor (EC 2.7.10.1) (HGFreceptor) (Scatter factor receptor) (SF receptor) (HGF/SF receptor)(Met proto-oncogene tyrosine kinase) (c-Met).	MET_1227_1239	P08581	RDMYDKEYYSVHN	[1230, 1234, 1235]	6.91187	7.00319	6.83885	7.35506	7.68888	7.46067	5.9859	6.23099	6.23967
Vascular endothelial growth factor receptor 1 precursor (EC 2.7.10.1)(VEGFR-1) (Vascular permeability factor receptor) (Tyrosine-proteinkinase receptor FLT) (Flt-1) (Tyrosine-protein kinase FRT) (Fms-liketyrosine kinase 1).	VGFR1_1235_1247	P17948	ATSMFDDYQGDSS	[1242]	0	0	0	0	0	0.715023	0	0	0
Receptor tyrosine-protein kinase erbB-2 precursor (EC 2.7.10.1)(p185erbB2) (C-erbB-2) (NEU proto-oncogene) (Tyrosine kinase-type cellsurface receptor HER2) (MLN 19) (CD340 antigen).	ERBB2_1241_1253	P04626	PTAENPEYLGLDV	[1248]	4.97512	5.04687	4.88218	4.82763	5.89687	5.43761	4.34488	3.6097	4.50929
1-phosphatidylinositol-4,5-bisphosphate phosphodiesterase gamma-1(EC 3.1.4.11) (Phosphoinositide phospholipase C) (PLC-gamma-1)(Phospholipase C-gamma-1) (PLC-II) (PLC-148).	PLCG1_1246_1258	P19174	EGSFESRYQQPFE	[1253]	0	0	0.747813	0	1.35954	0	0	0	0
Receptor tyrosine-protein kinase erbB-4 precursor (EC 2.7.10.1)(p180erbB4) (Tyrosine kinase-type cell surface receptor HER4).	ERBB4_1277_1289	Q15303	IVAENPEYLSEFS	[1284]	4.09704	4.5045	3.83813	3.17295	3.41163	3.48883	1.37011	2.94096	2.5482
Vascular endothelial growth factor receptor 1 precursor (EC 2.7.10.1)(VEGFR-1) (Vascular permeability factor receptor) (Tyrosine-proteinkinase receptor FLT) (Flt-1) (Tyrosine-protein kinase FRT) (Fms-liketyrosine kinase 1).	VGFR1_1326_1338	P17948	DYNSVVLYSTPPI	[1327, 1333]	6.40007	6.51406	6.35489	6.64658	6.74426	6.82018	5.38517	5.61026	5.52119
Vascular endothelial growth factor receptor 1 precursor (EC 2.7.10.1)(VEGFR-1) (Vascular permeability factor receptor) (Tyrosine-proteinkinase receptor FLT) (Flt-1) (Tyrosine-protein kinase FRT) (Fms-liketyrosine kinase 1).	VGFR1_1320_1332_C1320S/C1321S	P17948	SSSPPPDYNSVVL	[1327]	2.26076	1.80346	1.77193	1.0665	1.26076	0	0	0	0
Macrophage-stimulating protein receptor precursor (EC 2.7.10.1) (MSPreceptor) (p185-Ron) (CD136 antigen) (CDw136) [Contains: Macrophage-stimulating protein receptor alpha chain; Macrophage-stimulatingprotein receptor beta chain].	RON_1353_1365	Q04912	YVQLPATYMNLGP	[1353, 1360]	5.78876	6.00679	5.66601	5.63786	6.14629	6.00297	4.62743	4.91503	4.89047
Macrophage-stimulating protein receptor precursor (EC 2.7.10.1) (MSPreceptor) (p185-Ron) (CD136 antigen) (CDw136) [Contains: Macrophage-stimulating protein receptor alpha chain; Macrophage-stimulatingprotein receptor beta chain].	RON_1346_1358	Q04912	SALLGDHYVQLPA	[1353]	6.07055	5.98116	5.75085	6.22191	6.47145	6.0089	4.96295	5.21019	4.95946
Insulin receptor precursor (EC 2.7.10.1) (IR) (CD220 antigen)[Contains: Insulin receptor subunit alpha; Insulin receptor subunitbeta].	INSR_1348_1360	P06213	SLGFKRSYEEHIP	[1355]	3.35954	3.37274	2.311	2.10497	3.34086	3.58496	2.08586	0.841935	1.0665
Cell division protein kinase 2 (EC 2.7.11.22) (p33 protein kinase).	CDK2_8_20	P24941	EKIGEGTYGVVYK	[15, 19]	9.16353	9.19555	9.10882	10.0582	10.6124	10.1407	8.95727	8.98718	9.18656
T-cell surface glycoprotein CD3 zeta chain precursor (T-cell receptorT3 zeta chain) (CD247 antigen).	CD3Z_146_158	P20963	STATKDTYDALHM	[153]	5.573	2.78383	4.30137	3.65146	6.13665	4.84383	2.45695	2.83813	3.90144
Cell division protein kinase 7 (EC 2.7.11.22) (EC 2.7.11.23) (CDK-activating kinase) (CAK) (TFIIH basal transcription factor complexkinase subunit) (39 kDa protein kinase) (P39 Mo15) (STK1) (CAK1).	CDK7_157_169	P50613	GLAKSFGSPNRAY	[169]	5.65902	5.87848	5.577	5.71865	6.44607	6.06161	4.92672	4.63402	4.97944
B-cell antigen receptor complex-associated protein alpha-chainprecursor (Ig-alpha) (MB-1 membrane glycoprotein) (Surface IgM-associated protein) (Membrane-bound immunoglobulin-associated protein)(CD79a antigen).	CD79A_181_193	P11912	EYEDENLYEGLNL	[182, 188]	12.1946	12.4033	11.9852	13.3554	13.407	13.0624	12.4905	12.2923	12.2196
Mitogen-activated protein kinase 14 (EC 2.7.11.24) (Mitogen-activatedprotein kinase p38 alpha) (MAP kinase p38 alpha) (Cytokine suppressiveanti-inflammatory drug-binding protein) (CSAID-binding protein) (CSBP)(MAX-interacting protein 2) (MAP kinase MXI2) (SAPK2A).	MK14_173_185	Q16539	RHTDDEMTGYVAT	[182]	2.29445	2.98289	2.83432	3.13317	2.94804	1.96557	0.359542	0.249359	0.294447
Mitogen-activated protein kinase 12 (EC 2.7.11.24) (Extracellularsignal-regulated kinase 6) (ERK-6) (ERK5) (Stress-activated proteinkinase 3) (Mitogen-activated protein kinase p38 gamma) (MAP kinase p38gamma).	MK12_178_190	P53778	ADSEMTGYVVTRW	[185]	4.28889	4.79662	4.51287	4.77392	4.57472	4.62853	3.8514	4.11757	3.96557
Mitogen-activated protein kinase 1 (EC 2.7.11.24) (Extracellular signal-regulated kinase 2) (ERK-2) (Mitogen-activated protein kinase 2) (MAP kinase 2) (MAPK 2) (p42-MAPK) (ERT1).	MK01_180_192	P28482	HTGFLTEYVATRW	[187]	5.13161	5.30068	4.99232	5.0746	5.32125	5.49487	4.2565	4.54471	4.48153
Fatty acid-binding protein, heart (H-FABP) (Heart-type fatty acid-binding protein) (Muscle fatty acid-binding protein) (M-FABP)(Mammary-derived growth inhibitor) (MDGI).	FABPH_13_25	P05413	DSKNFDDYMKSLG	[20]	0	0	0	0	0	0	0	0	0
Linker for activation of T-cells family member 1 (36 kDa phospho-tyrosine adapter protein) (pp36) (p36-38).	LAT_194_206	O43561	MESIDDYVNVPES	[200]	5.36351	5.06243	4.92492	5.49246	5.32872	5.3422	2.96557	3.38582	3.63402
Myelin basic protein (MBP) (Myelin A1 protein) (Myelin membraneencephalitogenic protein).	MBP_198_210	P02686	ARTAHYGSLPQKS	[203]	5.80053	5.75992	6.02237	6.01901	6.74731	6.32702	5.03944	5.24434	5.29929
Complement C1r subcomponent precursor (EC 3.4.21.41) (Complementcomponent 1, r subcomponent) [Contains: Complement C1r subcomponentheavy chain; Complement C1r subcomponent light chain].	C1R_199_211	P00736	TEASGYISSLEYP	[204, 210]	1.27208	0	1.6384	1.85704	0	0	1.11757	0	0
Mitogen-activated protein kinase 1 (EC 2.7.11.24) (Extracellular signal-regulated kinase 2) (ERK-2) (Mitogen-activated protein kinase 2) (MAP kinase 2) (MAPK 2) (p42-MAPK) (ERT1).	MK01_198_210	P28482	IMLNSKGYTKSID	[205]	0	0	0	0	0	0	0	0	0
Paired mesoderm homeobox protein 2 (PRX-2) (Paired-related homeoboxprotein 2).	PRRX2_202_214	Q99811	WTASSPYSTVPPY	[208, 214]	6.87246	6.90621	6.69388	7.05896	7.42848	6.98718	5.92089	6.03819	6.24362
Annexin A1 (Annexin-1) (Annexin I) (Lipocortin I) (Calpactin II)(Chromobindin-9) (p35) (Phospholipase A2 inhibitory protein).	ANXA1_14_26	P04083	IENEEQEYVQTVK	[21]	5.277	5.36285	4.91954	5.69204	6.28958	5.94096	4.27489	4.83241	4.18347
Mitogen-activated protein kinase 7 (EC 2.7.11.24) (Extracellularsignal-regulated kinase 5) (ERK-5) (ERK4) (BMK1 kinase).	MK07_211_223	Q13164	AEHQYFMTEYVAT	[215, 220]	3.92134	4.15625	4.57928	4.55169	4.98375	4.5069	2.91594	3.48397	3.24075
Dual specificity tyrosine-phosphorylation-regulated kinase 1A(EC 2.7.12.1) (Protein kinase minibrain homolog) (MNBH) (HP86) (Dualspecificity YAK1-related kinase) (hMNB).	DYR1A_212_224	Q13627	KHDTEMKYYIVHL	[219, 220]	3.86079	4.24793	3.38842	4.58723	4.28749	3.88495	2.58496	1.51048	0.95858
Proto-oncogene C-crk (p38) (Adapter molecule crk).	CRK_214_226	P46108	GPPEPGPYAQPSV	[221]	4.85234	4.75489	5.13472	5.37208	5.78433	5.55053	4.36748	4.7356	4.73049
Mitogen-activated protein kinase 10 (EC 2.7.11.24) (Stress-activated protein kinase JNK3) (c-Jun N-terminal kinase 3) (MAP kinase p49 3F12).	MK10_216_228	P53779	TSFMMTPYVVTRY	[223, 228]	6.72329	6.86337	6.7007	7.06609	7.31066	7.20152	5.80784	6.04851	5.99574
Annexin A2 (Annexin-2) (Annexin II) (Lipocortin II) (Calpactin I heavychain) (Chromobindin-8) (p36) (Protein I) (Placental anticoagulantprotein IV) (PAP-IV).	ANXA2_17_29	P07355	HSTPPSAYGSVKA	[24]	4.96033	4.80151	4.37537	5.10655	6.21239	6.29202	4.09385	5.23931	4.55748
Embryonal Fyn-associated substrate (HEFS).	EFS_246_258	O43281	GGTDEGIYDVPLL	[253]	12.0069	12.2318	12.0629	13.3471	13.3202	13.0741	12.3535	12.3255	12.1192
Linker for activation of T-cells family member 1 (36 kDa phospho-tyrosine adapter protein) (pp36) (p36-38).	LAT_249_261	O43561	EEGAPDYENLQEL	[255]	6.74223	6.45634	6.53916	7.38859	7.89344	7.18646	5.52888	5.99104	5.52947
Myelin basic protein (MBP) (Myelin A1 protein) (Myelin membraneencephalitogenic protein).	MBP_259_271	P02686	FGYGGRASDYKSA	[261, 268]	2.93742	2.37537	2.5667	3.6644	3.51763	3.70253	2.92672	3.16992	2.61638
Myelin basic protein (MBP) (Myelin A1 protein) (Myelin membraneencephalitogenic protein).	MBP_263_275	P02686	GRASDYKSAHKGF	[268]	3.76193	3.7356	3.51763	3.78975	4.18347	4.22628	3.28889	3.22045	3.55053
Pyruvate dehydrogenase E1 component subunit alpha, testis-specificform, mitochondrial precursor (EC 1.2.4.1) (PDHE1-A type II).	ODPAT_291_303	P29803	SMSDPGVSYRTRE	[299]	0	0	0	0	0	0	0	0	1.3489
Paxillin.	PAXI_24_36	P49023	FLSEETPYSYPTG	[31, 33]	8.40771	8.57265	8.25391	9.09907	9.70954	9.09644	7.9373	8.048	8.03114
Dual specificity tyrosine-phosphorylation-regulated kinase 1A(EC 2.7.12.1) (Protein kinase minibrain homolog) (MNBH) (HP86) (Dualspecificity YAK1-related kinase) (hMNB).	DYR1A_312_324	Q13627	CQLGQRIYQYIQS	[319, 321]	6.25365	6.60104	6.41387	6.40779	6.95902	6.78852	5.14398	5.41865	5.61749
Neutrophil cytosol factor 1 (NCF-1) (Neutrophil NADPH oxidase factor1) (47 kDa neutrophil oxidase factor) (p47-phox) (NCF-47K) (47 kDaautosomal chronic granulomatous disease protein) (Nox organizer 2)(Nox-organizing protein 2) (SH3 and PX domain-containing protein 1A).	NCF1_313_325	P14598	QRSRKRLSQDAYR	[324]	5.6197	5.92448	5.77441	5.9889	7.06141	6.40683	4.92403	5.2636	5.34622
RAF proto-oncogene serine/threonine-protein kinase (EC 2.7.11.1) (Raf-1) (C-RAF) (cRaf).	RAF1_332_344	P04049	PRGQRDSSYYWEI	[340, 341]	7.76694	7.97479	7.61735	8.34956	8.87698	8.41147	7.34522	7.36929	7.56512
2-oxoisovalerate dehydrogenase subunit alpha, mitochondrial precursor(EC 1.2.4.4) (Branched-chain alpha-keto acid dehydrogenase E1component alpha chain) (BCKDH E1-alpha) (BCKDE1A).	ODBA_340_352	P12694	DDSSAYRSVDEVN	[345]	3.58269	3.31374	3.94274	2.53887	4.32872	3.77591	0	2.67296	2.43699
Erythropoietin receptor precursor (EPO-R).	EPOR_361_373	P19235	SEHAQDTYLVLDK	[368]	7.38582	7.57729	7.69979	8.05026	8.81976	8.22081	7.023	7.20393	7.34622
3-phosphoinositide-dependent protein kinase 1 (EC 2.7.11.1) (hPDK1).	PDPK1_369_381	O15530	DEDCYGNYDNLLS	[373, 376]	5.71968	5.70358	5.46437	6.2847	7.02509	6.41992	5.40458	5.48458	5.67509
Acetylcholine receptor subunit delta precursor.	ACHD_383_395	Q07001	YISKAEEYFLLKS	[383, 390]	5.70305	5.4351	5.51347	5.3348	5.13472	5.2861	3.59175	3.95156	3.40136
Tyrosine-protein kinase FRK (EC 2.7.10.2) (FYN-related kinase)(Nuclear tyrosine protein kinase RAK).	FRK_380_392	P42685	KVDNEDIYESRHE	[387]	8.85581	9.06883	9.01597	9.92649	10.8401	10.2425	8.91548	8.9875	9.27994
Proto-oncogene tyrosine-protein kinase LCK (EC 2.7.10.2) (p56-LCK)(Lymphocyte cell-specific protein-tyrosine kinase) (LSK) (T cell-specific protein-tyrosine kinase).	LCK_387_399	P06239	RLIEDNEYTAREG	[394]	6.14744	6.05385	6.16803	6.81148	7.68518	7.09445	5.91684	5.95639	6.21166
Erythropoietin receptor precursor (EPO-R).	EPOR_419_431	P19235	ASAASFEYTILDP	[426]	6.97728	7.07055	7.14898	7.75703	8.41674	7.77479	6.60775	6.60691	6.88794
Keratin, type II cytoskeletal 8 (Cytokeratin-8) (CK-8) (Keratin-8)(K8).	K2C8_425_437	P05787	SAYGGLTSPGLSY	[427, 437]	4.77888	4.61749	4.7468	4.87571	5.19094	4.95946	3.72946	3.73151	3.64277
Gamma-enolase (EC 4.2.1.11) (2-phospho-D-glycerate hydro-lyase)(Neural enolase) (Neuron-specific enolase) (NSE) (Enolase 2).	ENOG_37_49	P09104	SGASTGIYEALEL	[44]	11.5395	11.8247	11.6306	12.9571	13.4476	12.807	11.8013	11.6748	11.7778
Band 3 anion transport protein (Anion exchange protein 1) (AE 1)(Solute carrier family 4 member 1) (CD233 antigen).	B3AT_39_51	P02730	TEATATDYHTTSH	[46]	3.98116	3.7976	3.98804	3.93029	5.1509	4.47909	2.53417	3.33007	1.62081
Ras GTPase-activating protein 1 (GTPase-activating protein) (GAP) (Rasp21 protein activator) (p120GAP) (RasGAP).	RASA1_453_465	P20936	TVDGKEIYNTIRR	[460]	7.24219	7.26626	7.12148	8.02645	8.74395	8.29488	6.9636	7.17521	7.39749
Peripherin.	PERI_458_470	P41219	QRSELDKSSAHSY	[470]	0	0	0	0	0	0	0	0	0
Src substrate protein p85 (p80) (Cortactin).	SRC8_CHICK_476_488	Q01406	EYEPETVYEVAGA	[477, 483]	10.7743	11.0867	10.7488	11.9045	12.6408	12.0244	10.8849	10.952	11.1177
Src substrate protein p85 (p80) (Cortactin).	SRC8_CHICK_470_482	Q01406	VSQREAEYEPETV	[477]	0	0	0	0	4.5021	0	0	0	0
Tyrosine-protein kinase ZAP-70 (EC 2.7.10.2) (70 kDa zeta-associatedprotein) (Syk-related tyrosine kinase).	ZAP70_485_497	P43403	ALGADDSYYTARS	[492, 493]	6.86313	6.85892	6.62605	7.17408	7.81378	7.47252	6.07621	6.39426	6.59654
Src substrate protein p85 (p80) (Cortactin).	SRC8_CHICK_492_504	Q01406	YQAEENTYDEYEN	[492, 499, 502]	10.2327	10.5536	10.1427	11.5233	12.7432	11.8702	10.3195	10.4802	10.7
High affinity nerve growth factor receptor precursor (EC 2.7.10.1)(Neurotrophic tyrosine kinase receptor type 1) (TRK1-transformingtyrosine kinase protein) (p140-TrkA) (Trk-A).	NTRK1_489_501	P04629	HIIENPQYFSDAC	[496]	0	0	2.442	1.58496	0	0.500898	0	0	0
Sodium-dependent phosphate transport protein 2A (Sodium/phosphatecotransporter 2A) (Na(+)/Pi cotransporter 2A) (Sodium-phosphatetransport protein 2A) (Na(+)-dependent phosphate cotransporter 2A)(NaPi-2a) (Solute carrier family 34 member 1) (NaPi-3).	NPT2A_501_513	Q06495	AKALGKRTAKYRW	[511]	4.53652	5.18422	4.86173	5.32261	6.02613	5.54354	4.43321	4.29167	4.8636
Tyrosine-protein kinase Tec (EC 2.7.10.2).	TEC_512_524	P42680	RYFLDDQYTSSSG	[513, 519]	5.53123	5.7468	5.55227	5.94936	6.4329	5.98375	4.95595	5.22846	4.97512
Epithelial discoidin domain-containing receptor 1 precursor(EC 2.7.10.1) (Epithelial discoidin domain receptor 1) (Tyrosinekinase DDR) (Discoidin receptor tyrosine kinase) (Tyrosine-proteinkinase CAK) (Cell adhesion kinase) (TRK E) (Protein-tyrosine kinaseRTK 6) (HGK2) (CD167a antigen).	DDR1_506_518	Q08345	LLLSNPAYRLLLA	[513]	0	4.37274	3.87571	2.62523	4.64929	3.80735	0	1.43195	0
BDNF/NT-3 growth factors receptor precursor (EC 2.7.10.1)(Neurotrophic tyrosine kinase receptor type 2) (TrkB tyrosine kinase)(GP145-TrkB) (Trk-B).	NTRK2_509_521	Q16620	PVIENPQYFGITN	[516]	0	0.154723	0	0	0	0.986325	0	0	0
Tyrosine-protein kinase SYK (EC 2.7.10.2) (Spleen tyrosine kinase).	KSYK_518_530	P43405	ALRADENYYKAQT	[525, 526]	5.40843	5.23063	5.25222	5.43258	5.47482	5.34956	4.05508	4.31511	3.87199
Tyrosine-protein phosphatase non-receptor type 11 (EC 3.1.3.48)(Protein-tyrosine phosphatase 2C) (PTP-2C) (PTP-1D) (SH-PTP3) (SH-PTP2) (SHP-2) (Shp2).	PTN11_539_551	Q06124	SKRKGHEYTNIKY	[546, 551]	4.65362	4.35556	4.55285	4.83146	5.34488	5.0127	3.65578	3.66654	4.06324
Progesterone receptor (PR) (Nuclear receptor subfamily 3 group Cmember 3).	PRGR_545_557	P06401	LRPDSEASQSPQY	[557]	0	0	0	0	0	0	0	0	0
Focal adhesion kinase 1 (EC 2.7.10.2) (FADK 1) (pp125FAK) (Protein-tyrosine kinase 2).	FAK1_569_581	Q05397	RYMEDSTYYKASK	[570, 576, 577]	6.25757	6.17709	6.12344	6.34421	6.72458	6.71035	5.29306	5.42626	5.28889
Tyrosine-protein kinase JAK2 (EC 2.7.10.2) (Janus kinase 2) (JAK-2).	JAK2_563_577	O60674	VRREVGDYGQLHETE	[570]	5.91006	5.7764	5.98547	6.41928	7.17502	6.94693	5.56727	5.92358	5.37011
Protein tyrosine kinase 2 beta (EC 2.7.10.2) (Focal adhesion kinase 2)(FADK 2) (Proline-rich tyrosine kinase 2) (Cell adhesion kinase beta)(CAK beta) (Calcium-dependent tyrosine kinase) (CADTK) (Relatedadhesion focal tyrosine kinase) (RAFTK).	FAK2_572_584	Q14289	RYIEDEDYYKASV	[573, 579, 580]	6.71528	6.68227	6.42531	7.18459	7.36566	7.14187	5.91819	6.05057	5.93653
Beta-type platelet-derived growth factor receptor precursor(EC 2.7.10.1) (PDGF-R-beta) (CD140b antigen).	PGFRB_572_584	P09619	VSSDGHEYIYVDP	[579, 581]	8.50293	8.5024	8.06019	9.34136	10.5601	9.37291	8.09644	8.06131	8.18385
Ephrin type-A receptor 2 precursor (EC 2.7.10.1) (Tyrosine-proteinkinase receptor ECK) (Epithelial cell kinase).	EPHA2_581_593	P29317	QLKPLKTYVDPHT	[588]	1.09226	0	1.86454	0	0	1.29445	0	0	0
Ephrin type-B receptor 4 precursor (EC 2.7.10.1) (Tyrosine-proteinkinase receptor HTK) (Tyrosine-protein kinase TYRO11).	EPHB4_583_595	P54760	IGHGTKVYIDPFT	[590]	3.91594	4.76092	4.52001	3.98289	3.8831	4.07621	3.04687	2.311	3.02362
Ephrin type-A receptor 4 precursor (EC 2.7.10.1) (Tyrosine-proteinkinase receptor SEK) (Receptor protein-tyrosine kinase HEK8)(Tyrosine-protein kinase TYRO1).	EPHA4_589_601	P54764	LNQGVRTYVDPFT	[596]	4.82283	4.71399	4.55517	4.23208	2.40136	4.62523	3.23498	2.96557	3.35689
Phosphatidylinositol 3-kinase regulatory subunit alpha (PI3-kinase p85subunit alpha) (PtdIns-3-kinase p85-alpha) (PI3K).	P85A_600_612	P27986	NENTEDQYSLVED	[607]	8.45734	8.57722	8.48191	9.5063	10.178	9.70651	8.30988	8.26103	8.28068
Ephrin type-A receptor 7 precursor (EC 2.7.10.1) (Tyrosine-proteinkinase receptor EHK-3) (EPH homology kinase 3) (Receptor protein-tyrosine kinase HEK11).	EPHA7_607_619	Q15375	TYIDPETYEDPNR	[608, 614]	6.80638	6.97922	6.65686	7.24864	8.05866	7.54806	6.43541	6.63128	6.36451
Keratin, type II cytoskeletal 6B (Cytokeratin-6B) (CK 6B) (K6bkeratin).	K2C6B_53_65	P04259	GAGFGSRSLYGLG	[62]	7.22081	7.31237	7.25525	7.19763	7.45339	7.21643	5.86267	6.19726	5.92895
Zinc finger and BTB domain-containing protein 16 (Zinc finger proteinPLZF) (Promyelocytic leukemia zinc finger protein) (Zinc fingerprotein 145).	ZBT16_621_633	Q05516	LRTHNGASPYQCT	[630]	4.78086	4.77193	4.5057	5.02697	5.3962	5.23208	3.61638	3.99659	4.12539
Signal transducer and activator of transcription 6 (IL-4 Stat).	STAT6_634_646	P42226	MGKDGRGYVPATI	[641]	0.226276	0	0	1.95156	0	0	0	0	0
Fibroblast growth factor receptor 3 precursor (EC 2.7.10.1) (FGFR-3)(CD333 antigen).	FGFR3_641_653	P22607	DVHNLDYYKKTTN	[647, 648]	0	0	0	1.84194	0	0	0	0	0
Protein 4.1 (Band 4.1) (P4.1) (EPB4.1) (4.1R).	41_654_666	P11171	LDGENIYIRHSNL	[660]	7.2941	7.2777	7.23498	8.16576	8.64766	8.24605	6.91503	7.10378	6.95836
Tyrosine-protein kinase receptor TYRO3 precursor (EC 2.7.10.1)(Tyrosine-protein kinase RSE) (Tyrosine-protein kinase SKY) (Tyrosine-protein kinase DTK) (Protein-tyrosine kinase byk).	TYRO3_679_691	Q06418	KIYSGDYYRQGCA	[681, 685, 686]	5.94627	6.06039	5.8771	6.41387	6.69467	6.59034	5.29999	5.48458	5.53652
Proto-oncogene tyrosine-protein kinase receptor ret precursor(EC 2.7.10.1) (C-ret).	RET_680_692	P07949	AQAFPVSYSSSGA	[687]	0	0	0	0	0	0	0	0	0
Signal transducer and activator of transcription 4.	STAT4_686_698	Q14765	TERGDKGYVPSVF	[693]	1.31647	0	0	1.49125	0	0	0	0	0
Signal transducer and activator of transcription 5A.	STA5A_687_699	P42229	LAKAVDGYVKPQI	[694]	1.82667	0	1.05344	0	3.04687	0	0	0	0
E3 ubiquitin-protein ligase CBL (EC 6.3.2.-) (Signal transductionprotein CBL) (Proto-oncogene c-CBL) (Casitas B-lineage lymphoma proto-oncogene) (RING finger protein 55).	CBL_693_705	P22681	EGEEDTEYMTPSS	[700]	5.15013	5.1018	5.10576	5.26076	5.95024	5.53711	3.33278	4.48761	4.28051
Signal transducer and activator of transcription 1-alpha/beta(Transcription factor ISGF-3 components p91/p84).	STAT1_694_706	P42224	DGPKGTGYIKTEL	[701]	0	0	0	0	0	0	0	0	0
BDNF/NT-3 growth factors receptor precursor (EC 2.7.10.1)(Neurotrophic tyrosine kinase receptor type 2) (TrkB tyrosine kinase)(GP145-TrkB) (Trk-B).	NTRK2_696_708	Q16620	GMSRDVYSTDYYR	[702, 706, 707]	7.82751	7.65632	7.44232	7.99446	8.18768	7.9697	6.59851	6.55835	6.95617
Signal transducer and activator of transcription 3 (Acute-phaseresponse factor).	STAT3_698_710	P40763	DPGSAAPYLKTKF	[705]	0	0	0	2.92313	2.20282	1.07943	0.249359	0	0
Proto-oncogene tyrosine-protein kinase Fes/Fps (EC 2.7.10.2) (C-Fes).	FES_706_718	P07332	REEADGVYAASGG	[713]	8.12597	8.31348	8.33758	8.9368	9.70253	9.20272	7.8037	7.92358	8.07086
Platelet endothelial cell adhesion molecule precursor (PECAM-1)(EndoCAM) (GPIIA') (CD31 antigen).	PECA1_706_718	P16284	KKDTETVYSEVRK	[713]	8.33505	8.30911	8.38199	9.39167	10.0243	9.52781	8.27656	8.35323	8.66272
Proto-oncogene tyrosine-protein kinase FER (EC 2.7.10.2) (p94-FER) (c-FER) (Tyrosine kinase 3).	FER_707_719	P16591	RQEDGGVYSSSGL	[714]	7.45742	7.4619	7.574	8.1509	8.67649	8.22455	6.86267	7.03488	6.90075
Beta-type platelet-derived growth factor receptor precursor(EC 2.7.10.1) (PDGF-R-beta) (CD140b antigen).	PGFRB_709_721	P09619	RPPSAELYSNALP	[716]	7.45571	7.33951	7.42911	7.77677	7.57443	7.52578	6.03861	6.36682	6.07096
Signal transducer and activator of transcription 4.	STAT4_714_726	Q14765	PSDLLPMSPSVYA	[725]	3.79564	3.15166	3.81704	3.9285	4.33413	4.25507	2.46684	3.31647	3.21752
Fibroblast growth factor receptor 3 precursor (EC 2.7.10.1) (FGFR-3)(CD333 antigen).	FGFR3_753_765	P22607	TVTSTDEYLDLSA	[760]	5.93386	5.81463	5.77789	5.92223	6.30309	5.86313	4.27489	4.73356	4.5667
Basic fibroblast growth factor receptor 1 precursor (EC 2.7.10.1)(FGFR-1) (bFGF-R) (Fms-like tyrosine kinase 2) (c-fgr) (CD331antigen).	FGFR1_761_773	P11362	TSNQEYLDLSMPL	[766]	4.577	5.33413	4.87292	4.29722	5.07702	4.32193	2.67296	2.88679	2.7356
Fibroblast growth factor receptor 2 precursor (EC 2.7.10.1) (FGFR-2)(Keratinocyte growth factor receptor 2) (CD332 antigen).	FGFR2_762_774	P21802	TLTTNEEYLDLSQ	[769]	6.14475	5.84573	5.93163	6.17144	6.55053	5.78235	4.36484	4.87571	4.45695
Beta-type platelet-derived growth factor receptor precursor(EC 2.7.10.1) (PDGF-R-beta) (CD140b antigen).	PGFRB_768_780	P09619	SSNYMAPYDNYVP	[771, 775, 778]	6.38354	6.48397	6.42278	6.77018	7.09942	6.7976	5.71139	5.84194	5.51585
Beta-type platelet-derived growth factor receptor precursor(EC 2.7.10.1) (PDGF-R-beta) (CD140b antigen).	PGFRB_771_783	P09619	YMAPYDNYVPSAP	[771, 775, 778]	5.45074	5.58099	5.43195	5.85892	6.41801	6.05385	4.61638	4.99147	4.72329
1-phosphatidylinositol-4,5-bisphosphate phosphodiesterase gamma-1(EC 3.1.4.11) (Phosphoinositide phospholipase C) (PLC-gamma-1)(Phospholipase C-gamma-1) (PLC-II) (PLC-148).	PLCG1_764_776	P19174	IGTAEPDYGALYE	[771, 775]	9.78806	10.0632	9.80041	10.7452	11.339	10.8229	9.58528	9.79772	9.65835
Ephrin type-A receptor 2 precursor (EC 2.7.10.1) (Tyrosine-proteinkinase receptor ECK) (Epithelial cell kinase).	EPHA2_765_777	P29317	EDDPEATYTTSGG	[772]	8.00329	8.38948	8.11128	8.96883	9.53473	9.37184	7.82403	7.68372	8.04872
Ephrin type-B receptor 1 precursor (EC 2.7.10.1) (Tyrosine-proteinkinase receptor EPH-2) (NET) (HEK6) (ELK).	EPHB1_771_783	P54762	DDTSDPTYTSSLG	[778]	6.95967	7.01355	6.93853	7.62164	8.34881	7.95595	6.50869	6.5667	6.64168
Ephrin type-A receptor 1 precursor (EC 2.7.10.1) (Tyrosine-proteinkinase receptor EPH).	EPHA1_774_786	P21709	LDDFDGTYETQGG	[781]	7.32584	7.59753	7.34839	8.06589	9.33202	8.6264	7.07722	7.29098	7.51108
1-phosphatidylinositol-4,5-bisphosphate phosphodiesterase gamma-1(EC 3.1.4.11) (Phosphoinositide phospholipase C) (PLC-gamma-1)(Phospholipase C-gamma-1) (PLC-II) (PLC-148).	PLCG1_776_788	P19174	EGRNPGFYVEANP	[783]	2.4269	0	1.49125	0	3.06324	0	1.02697	0	0
Progesterone receptor (PR) (Nuclear receptor subfamily 3 group Cmember 3).	PRGR_786_798	P06401	EQRMKESSFYSLC	[795]	4.9498	5.05671	4.79858	5.26005	5.64168	5.17219	4.07136	4.22918	3.76393
Retinoblastoma-associated protein (PP110) (P105-RB) (RB).	RB_804_816	P06400	IYISPLKSPYKIS	[805, 813]	5.91999	6.28086	6.25329	6.30171	6.68306	6.575	5.01691	5.52888	5.24649
Vinculin (Metavinculin).	VINC_815_827	P18206	KSFLDSGYRILGA	[822]	5.56037	5.63512	5.37077	5.22555	5.72432	5.54646	4.5033	4.45323	4.77292
Catenin beta-1 (Beta-catenin).	CTNB1_79_91	P35222	VADIDGQYAMTRA	[86]	5.72843	5.88126	5.77193	6.26891	6.81366	6.45571	5.17295	5.277	5.569
Epidermal growth factor receptor precursor (EC 2.7.10.1) (Receptortyrosine-protein kinase ErbB-1).	EGFR_862_874	P00533	LGAEEKEYHAEGG	[869]	0	0	0	0	0	0	0	0	0
Receptor tyrosine-protein kinase erbB-2 precursor (EC 2.7.10.1)(p185erbB2) (C-erbB-2) (NEU proto-oncogene) (Tyrosine kinase-type cellsurface receptor HER2) (MLN 19) (CD340 antigen).	ERBB2_870_882	P04626	LDIDETEYHADGG	[877]	3.38322	3.21166	3.72535	4.34488	5.58893	4.97339	3.21752	3.78581	3.6644
3-phosphoinositide-dependent protein kinase 1 (EC 2.7.11.1) (hPDK1).	PDPK1_2_14	O15530	ARTTSQLYDAVPI	[9]	8.57336	8.37085	8.36269	8.97127	8.9636	8.61894	7.45059	7.47772	7.54369
Troponin T, slow skeletal muscle (TnTs) (Slow skeletal muscle troponinT) (sTnT).	TNNT1_2_14	P13805	SDTEEQEYEEEQP	[9]	0	0	0	0	0	0	0	0	0
Epidermal growth factor receptor precursor (EC 2.7.10.1) (Receptortyrosine-protein kinase ErbB-1).	EGFR_908_920	P00533	MTFGSKPYDGIPA	[915]	0	0	0	0	3.41163	0	0	0	0
Ephrin type-A receptor 4 precursor (EC 2.7.10.1) (Tyrosine-proteinkinase receptor SEK) (Receptor protein-tyrosine kinase HEK8)(Tyrosine-protein kinase TYRO1).	EPHA4_921_933	P54764	QAIKMDRYKDNFT	[928]	0	0	0	0	0	0	0	0.747813	0
Ephrin type-B receptor 1 precursor (EC 2.7.10.1) (Tyrosine-proteinkinase receptor EPH-2) (NET) (HEK6) (ELK).	EPHB1_921_933	P54762	SAIKMVQYRDSFL	[928]	5.22336	5.60579	5.3529	5.31511	5.87941	5.75841	4.33142	4.4231	4.35689
Vascular endothelial growth factor receptor 2 precursor (EC 2.7.10.1)(VEGFR-2) (Kinase insert domain receptor) (Protein-tyrosine kinasereceptor Flk-1) (CD309 antigen).	VGFR2_944_956	P35968	RFRQGKDYVGAIP	[951]	5.44701	5.78433	5.55285	5.81318	6.51198	6.08546	4.71813	4.91142	5.15854
Insulin receptor precursor (EC 2.7.10.1) (IR) (CD220 antigen)[Contains: Insulin receptor subunit alpha; Insulin receptor subunitbeta].	INSR_992_1004	P06213	YASSNPEYLSASD	[992, 999]	3.67296	4.13317	3.75791	3.97771	2.33278	3.83813	0	1.55748	2.01355
Vascular endothelial growth factor receptor 2 precursor (EC 2.7.10.1)(VEGFR-2) (Kinase insert domain receptor) (Protein-tyrosine kinasereceptor Flk-1) (CD309 antigen).	VGFR2_989_1001	P35968	EEAPEDLYKDFLT	[996]	7.70645	8.1207	7.76893	8.5027	9.49962	9.04748	7.5277	7.70853	7.96186

## Sheet: STK Log2
Supplementary Table 2. Kinome Screening results for serine / threonine continaining peptides
Description	ID	Peptide Sequence	Parental	Parental	Parental	LapR	LapR	LapR	Post-TGF	Post-TGF	Post-TGF
Muscarinic acetylcholine receptor M1.	ACM1_421_433	CNKAFRDTFRLLL	5.42183	4.73663	6.3539	5.15549	6.00297	6.09306	5.06731	5.25721	6.19689
Muscarinic acetylcholine receptor M1.	ACM1_444_456	KIPKRPGSVHRTP	5.17596	4.82763	6.69861	5.573	5.47726	6.38712	5.21899	5.92627	5.84194
Muscarinic acetylcholine receptor M4.	ACM4_456_468	CNATFKKTFRHLL	5.02446	4.80151	6.08546	5.27138	4.99061	5.68676	5.17219	5.38582	5.08024
Muscarinic acetylcholine receptor M5.	ACM5_494_506	CYALCNRTFRKTF	7.99361	7.54544	9.65027	8.3524	8.11296	8.94572	8.12889	7.97609	9.05656
Muscarinic acetylcholine receptor M5.	ACM5_498_510	CNRTFRKTFKMLL	5.97858	5.58893	8.16225	6.27384	6.20651	7.533	6.03322	5.91097	7.71748
Beta-adducin (Erythrocyte adducin subunit beta)	ADDB_696_708	GSPSKSPSKKKKK	5.577	5.71865	5.47604	5.56152	5.8923	5.16006	5.73969	5.00764	4.9983
Beta-adducin (Erythrocyte adducin subunit beta)	ADDB_706_718	KKKFRTPSFLKKS	6.21643	6.29306	7.11404	6.45943	6.36252	6.72278	6.27735	6.65821	6.55488
Beta-2 adrenergic receptor (Beta-2 adrenoceptor) (Beta-2adrenoreceptor).	ADRB2_338_350	ELLCLRRSSLKAY	7.64249	6.5057	6.93986	7.58269	7.26537	6.40297	7.50075	7.41849	6.40522
RAC-alpha serine/threonine-protein kinase (EC 2.7.11.1) (RAC-PK-alpha)(Protein kinase B) (PKB) (C-AKT).	AKT1_301_313	KDGATMKTFCGTP	4.79466	5.07136	4.52947	4.36879	4.52829	4.40265	4.93653	4.46684	4.11443
Androgen receptor (Dihydrotestosterone receptor) (Nuclear receptor subfamily 3 group C member 4).	ANDR_785_797	VRMRHLSQEFGWL	4.29722	3.82859	7.1486	4.38842	4.35423	6.71165	4.35822	3.9983	6.93208
Annexin A1 (Annexin-1) (Annexin I) (Lipocortin I) (Calpactin II)(Chromobindin-9) (p35) (Phospholipase A2 inhibitory protein).	ANXA1_209_221	AGERRKGTDVNVF	5.78482	5.30825	7.198	5.98375	5.97252	6.71942	5.533	5.87987	6.77864
Cyclic AMP-dependent transcription factor ATF-2 (Activatingtranscription factor 2) (cAMP response element-binding protein CRE-BP1) (HB16).	ATF2_47_59	VADQTPTPTRFLK	5.05344	2.67296	0	4.69204	4.44825	4.89322	5.37995	5.40329	4.72226
Serine-protein kinase ATM (EC=2.7.11.1) (Ataxia telangiectasia mutated) (A-T, mutated).	ATM_1972_1984	KRSLAFEEGSQST	4.59963	2.2777	0	3.08265	2.311	0	0	3.10497	0.731511
Bcl2 antagonist of cell death (BAD) (Bcl-2-binding component 6) (Bcl-XL/Bcl-2-associated death promoter) (Bcl-2-like 8 protein).	BAD_112_124	RELRRMSDEFVDS	6.27173	6.08986	7.60537	6.4329	6.71658	7.32329	6.52858	6.71347	7.34555
Bcl2 antagonist of cell death (BAD) (Bcl-2-binding component 6) (Bcl-XL/Bcl-2-associated death promoter) (Bcl-2-like 8 protein).	BAD_69_81	IRSRHSSYPAGTE	5.7769	5.29653	6.9762	6.25007	5.96731	6.29895	5.68094	5.83432	6.01817
Bcl2 antagonist of cell death (BAD) (Bcl-2-binding component 6) (Bcl-XL/Bcl-2-associated death promoter) (Bcl-2-like 8 protein).	BAD_93_105	FRGRSRSAPPNLW	8.40329	7.47129	8.0667	8.42103	8.14475	7.37291	8.24703	8.25846	7.37126
[3-methyl-2-oxobutanoate dehydrogenase [lipoamide]] kinase,mitochondrial precursor (EC 2.7.11.4) (Branched-chain alpha-ketoaciddehydrogenase kinase) (BCKDHKIN) (BCKD-kinase).	BCKD_45_57	ERSKTVTSFYNQS	4.4864	4.27911	5.13549	4.80638	4.96208	4.61415	4.70253	4.55748	5.44638
Breast cancer type 1 susceptibility protein (RING finger protein 53).	BRCA1_1451_1463	EKAVLTSQKSSEY	3.67935	4.3192	2.42183	4.33682	4.05671	2.82283	4.50929	4.04026	2.62963
Complement C1r subcomponent (EC=3.4.21.41)	C1R_201_213	ASGYISSLEYPRS	4.29583	4.62633	4.4619	4.40907	4.26643	4.56325	4.34756	4.89961	4.16538
Voltage-dependent calcium channel subunit alpha-2/delta-1 precursor(Voltage-gated calcium channel subunit alpha-2/delta-1) [Contains:Voltage-dependent calcium channel subunit alpha-2-1; Voltage-dependentcalcium channel subunit delta-1].	CA2D1_494_506	LEDIKRLTPRFTL	5.08024	4.39102	6.34153	4.7569	4.8636	6.64413	4.80833	4.69939	6.31511
Voltage-dependent L-type calcium channel subunit alpha-1C (Voltage-gated calcium channel subunit alpha Cav1.2) (Calcium channel, L type,alpha-1 polypeptide, isoform 1, cardiac muscle).	CAC1C_1974_1986	ASLGRRASFHLEC	7.84691	6.83599	6.80881	7.32159	7.05487	6.27102	7.26873	7.37356	6.25329
CD27 antigen precursor (CD27L receptor) (T-cell activation antigenCD27) (T14) (Tumor necrosis factor receptor superfamily member 7).	CD27_212_224	HQRRKYRSNKGES	5.88909	5.92044	6.91909	6.08305	5.90825	6.3907	5.89961	5.62025	6.24542
Cell division control protein 2 homolog (EC 2.7.11.22) (EC 2.7.11.23) (p34 protein kinase) (Cyclin-dependent kinase 1) (CDK1).	CDC2_154_169	GIPIRVYTHEVVTLWY	4.62081	4.8209	4.57472	4.58723	4.58269	4.44451	3.76193	4.79858	3.35156
Cell division protein kinase 7 (EC 2.7.11.22) (EC 2.7.11.23) (CDK-activating kinase) (CAK) (TFIIH basal transcription factor complexkinase subunit) (39 kDa protein kinase) (P39 Mo15) (STK1) (CAK1).	CDK7_163_175	GSPNRAYTHQVVT	5.12227	4.58383	5.87848	5.90961	5.92895	5.16006	5.08265	5.0253	5.32668
Cyclin-dependent kinase inhibitor 1 (p21) (CDK-interacting protein 1) (Melanoma differentiation-associated protein 6) (MDA-6).	CDN1A_139_151	GRKRRQTSMTDFY	10.6218	9.9568	12.3993	11.2206	10.9268	12.2045	11.191	11.3676	12.0955
Cyclin-dependent kinase inhibitor 1B (Cyclin-dependent kinase inhibitor p27) (p27Kip1).	CDN1B_151_163	IRKRPATDDSSTQ	4.43447	0	3.49849	4.9983	3.23786	3.99318	5.18646	4.28889	3.51048
Histone H3-like centromeric protein A (Centromere protein A) (CENP-A)(Centromere autoantigen A).	CENPA_1_14	MGPRRRSRKPEAPR	7.02132	7.09883	8.6824	7.89001	7.80236	8.05446	7.70983	7.8915	8.43164
Cystic fibrosis transmembrane conductance regulator (CFTR) (cAMP-dependent chloride channel) (ATP-binding cassette transporter sub-family C member 7).	CFTR_730_742	EPLERRLSLVPDS	7.33884	6.22555	6.34187	7.01228	7.07621	6.19243	6.85869	7.29202	6.12578
Cystic fibrosis transmembrane conductance regulator (CFTR) (cAMP-dependent chloride channel) (ATP-binding cassette transporter sub-family C member 7).	CFTR_761_773	LQARRRQSVLNLM	10.4151	9.63046	9.59865	10.1623	9.90788	9.10675	9.9219	9.95573	8.95502
Choriogonadotropin subunit beta precursor (CG-beta) (Chorionicgonadotrophin chain beta).	CGHB_109_121	QCALCRRSTTDCG	5.67456	4.76293	5.56383	5.38907	5.04769	5.02697	4.74172	4.89687	5.07055
Cofilin-1 (Cofilin, non-muscle isoform) (18 kDa phosphoprotein) (p18).	COF1_17_29	DMKVRKSSTPEEV	3.86079	3.442	3.569	2.63402	4.64603	3.74579	1.33817	5.11443	3.15166
cAMP response element-binding protein (CREB).	CREB1_126_138	EILSRRPSYRKIL	7.4495	6.51496	7.08506	7.3204	6.9697	6.82283	6.89184	6.93029	6.58354
Macrophage colony-stimulating factor 1 receptor precursor(EC 2.7.10.1) (CSF-1-R) (Fms proto-oncogene) (c-fms) (CD115 antigen).	CSF1R_701_713	NIHLEKKYVRRDS	8.16747	7.44825	9.08721	8.4045	8.46105	8.42238	7.73981	8.4585	8.08255
Casein kinase II subunit alpha (EC 2.7.11.1) (CK II).	CSK21_355_367	ISSVPTPSPLGPL	3.60747	0	0	0	0	0	0	0	0
Neuronal migration protein doublecortin (Lissencephalin-X) (Lis-X)(Doublin).	DCX_49_61	HFDERDKTSRNMR	5.48701	5.24147	5.68571	5.37733	4.89961	5.03363	5.15319	5.60859	4.31647
Desmoplakin (DP) (250/210 kDa paraneoplastic pemphigus antigen).	DESP_2842_2854	RSGSRRGSFDATG	6.03861	5.10576	5.7407	5.51287	5.19466	5.20134	4.93386	5.0608	5.30206
Early E1A 32 kDa protein.	E1A_ADE05_212_224	AILRRPTSPVSRE	8.41251	7.69138	7.49578	8.29981	8.02111	7.13936	7.99915	7.89813	6.96404
ETS domain-containing protein Elk-1.	ELK1_356_368	LLPTHTLTPVLLT	3.08906	0	0	2.80735	0	0	3.53182	3.15472	0
ETS domain-containing protein Elk-1.	ELK1_410_422	ISVDGLSTPVVLS	3.2861	3.569	0	1.77193	0	1.07943	3.48397	2.22628	2.87941
Erythrocyte membrane protein band 4.2 (Erythrocyte protein 4.2)(P4.2).	EPB42_241_253	LLNKRRGSVPILR	8.94539	7.87756	7.91153	8.94671	8.55835	7.51138	8.57014	8.49231	7.53123
Receptor tyrosine-protein kinase erbB-2 precursor (EC 2.7.10.1)(p185erbB2) (C-erbB-2) (NEU proto-oncogene) (Tyrosine kinase-type cellsurface receptor HER2) (MLN 19) (CD340 antigen).	ERBB2_679_691	QQKIRKYTMRRLL	7.47604	6.93675	8.42998	7.72676	7.51897	7.86407	7.14994	7.05753	7.65794
ETS domain-containing transcription factor ERF (Ets2 repressorfactor).	ERF_519_531	GEAGGPLTPRRVS	4.06324	4.07136	5.02697	4.38452	4.15778	4.52474	4.34622	3.64712	4.36219
Estrogen receptor (ER) (Estradiol receptor) (ER-alpha) (Nuclearreceptor subfamily 3 group A member 1).	ESR1_160_172	GGRERLASTNDKG	8.89029	8.60691	9.80993	9.23809	9.10036	9.40462	8.80291	8.67589	9.34597
6-phosphofructo-2-kinase/fructose-2,6-biphosphatase 3 (6PF-2-K/Fru-2,6-P2ASE brain/placenta-type isozyme) (iPFK-2) (Renal carcinomaantigen NY-REN-56) [Includes: 6-phosphofructo-2-kinase (EC 2.7.1.105);Fructose-2,6-bisphosphatase (EC 3.1.3.46)].	F263_454_466	NPLMRRNSVTPLA	10.0359	9.11502	9.4198	10.0919	9.86637	9.304	9.89839	10.1065	9.43773
Fibrinogen alpha chain precursor [Contains: Fibrinopeptide A].	FIBA_569_581	EFPSRGKSSSYSK	5.48518	4.49849	6.71061	4.90507	5.26147	5.28401	5.53652	5.56325	4.81801
Forkhead box protein O3 (Forkhead in rhabdomyosarcoma-like 1) (AF6q21protein).	FOXO3_25_37	QSRPRSCTWPLQR	7.36814	6.80881	9.04264	8.19698	8.04326	8.29132	8.30232	8.25792	8.38264
FKBP12-rapamycin complex-associated protein (FK506-binding protein 12-rapamycin complex-associated protein 1) (Rapamycin target protein) (RAPT1) (Mammalian target of rapamycin) (mTOR).	FRAP_2443_2455	RTRTDSYSAGQSV	5.5644	5.00764	6.1207	5.51644	5.55111	5.34287	5.85657	5.46376	5.32804
FKBP12-rapamycin complex-associated protein (FK506-binding protein 12-rapamycin complex-associated protein 1) (Rapamycin target protein) (RAPT1) (Mammalian target of rapamycin) (mTOR).	FRAP_2475_2487	VPESIHSFIGDGL	2.15472	4.24793	1.43195	3.05016	4.19541	2.6601	0	0	1.31647
Gamma-aminobutyric acid receptor subunit beta-2 precursor (GABA(A)receptor subunit beta-2).	GBRB2_427_439	SRLRRRASQLKIT	9.21212	8.27349	8.48564	8.97658	8.65734	8.00933	8.6828	8.59689	7.89184
Sphingosine 1-phosphate receptor GPR6 (G-protein coupled receptor 6).	GPR6_349_361	QSKVPFRSRSPSE	6.23786	6.17144	7.31545	6.34321	6.52149	6.96469	6.25007	6.39975	6.61804
G-protein-signaling modulator 2 (Mosaic protein LGN).	GPSM2_394_406	PKLGRRHSMENME	5.73049	5.58723	6.40971	5.24721	5.49849	5.99659	4.99232	5.71709	5.84856
Glutamate receptor, ionotropic kainate 2 precursor (Glutamate receptor6) (GluR-6) (GluR6) (Excitatory amino acid receptor 4) (EAA4).	GRIK2_708_720	FMSSRRQSVLVKS	9.42567	8.44059	8.52497	8.89098	8.75766	7.98149	8.88621	8.98079	7.79943
G-substrate.	GSUB_61_73	KKPRRKDTPALHI	5.87013	5.17445	6.88057	6.08666	5.70358	6.95464	5.78581	5.57472	6.31476
Glycogen [starch] synthase, liver (EC 2.4.1.11).	GYS2_1_13	MLRGRSLSVTSLG	8.87222	7.75186	9.59689	9.19671	8.76237	8.98568	8.56591	8.3453	8.88391
Histone H2B type 1-B (H2B.f) (H2B/f) (H2B.1).	H2B1B_ 27_40	GKKRKRSRKESYSI	6.02571	5.47604	6.83384	6.13627	6.11875	6.65281	5.77839	5.72741	6.17558
Histone H3.2 (H3/m) (H3/o).	H32_3_18	RTKQTARKSTGGKAPR	5.75186	5.30206	6.64793	5.54995	5.87292	6.49095	5.6973	5.34019	6.08225
Eukaryotic translation initiation factor 4E (eIF-4E) (eIF4E) (mRNA cap-binding protein) (eIF-4F 25 kDa subunit).	IF4E_203_215	TATKSGSTTKNRF	5.27419	5.00085	5.73867	5.02864	5.43195	5.3055	4.84288	4.20282	5.07379
NF-kappa-B inhibitor alpha (I-kappa-B-alpha) (IkappaBalpha) (IkB-alpha) (Major histocompatibility complex enhancer-binding protein MAD3).	IKBA_26_38	LDDRHDSGLDSMK	3.15778	3.97425	4.27489	2.89779	3.97252	3.32193	3.77392	3.64929	2.55748
Inhibitor of nuclear factor kappa-B kinase subunit beta (I-kappa-B-kinase beta) (IkBKB) (IKK-beta) (IKK-B) (EC=2.7.11.10) (I-kappa-B kinase 2) (IKK2) (Nuclear factor NF-kappa-B inhibitor kinase beta) (NFKBIKB).	IKKB_173_185_C179A	LDQGSLATSFVGT	2.36484	3.48153	0	0	2.26076	3.24936	1.77193	1.57586	0
Inhibitor of nuclear factor kappa-B kinase subunit beta (I-kappa-B-kinase beta) (IkBKB) (IKK-beta) (IKK-B) (EC=2.7.11.10) (I-kappa-B kinase 2) (IKK2) (Nuclear factor NF-kappa-B inhibitor kinase beta) (NFKBIKB).	IKKB_686_698	QLMSQPSTASNSL	0.61193	2.61193	0.61193	2.51525	3.03695	2.15472	3.08265	0	0
6-phosphofructokinase, liver type (EC 2.7.1.11) (Phosphofructokinase1) (Phosphohexokinase) (Phosphofructo-1-kinase isozyme B) (PFK-B).	K6PL_766_778	LEHVTRRTLSMDK	6.04068	4.87199	6.5033	5.70619	5.68412	6.13084	5.73969	5.5021	6.11796
cAMP-dependent protein kinase type II-alpha regulatory subunit.	KAP2_92_104	SRFNRRVSVCAET	8.96251	8.21908	8.2319	8.57871	8.3375	7.22227	8.56799	8.33024	7.02509
cAMP-dependent protein kinase type II-beta regulatory subunit.	KAP3_107_119	NRFTRRASVCAEA	9.51481	8.85446	9.10749	9.33058	9.0517	8.36863	9.12505	8.93347	8.42721
cAMP-dependent protein kinase catalytic subunit gamma (EC 2.7.11.11)(PKA C-gamma).	KAPCG_192_206	VKGRTWTLCGTPEYL	5.66922	5.39491	6.18908	5.4797	5.59963	5.63567	5.47909	5.56095	5.64549
Calcium/calmodulin-dependent protein kinase type II gamma chain(EC 2.7.11.17) (CaM-kinase II gamma chain) (CaM kinase II subunitgamma) (CaMK-II subunit gamma).	KCC2G_278_289	VASMMHRQETVE	6.21972	5.93118	7.92167	6.87547	6.77566	7.45447	6.85892	6.65794	7.48837
Potassium voltage-gated channel subfamily A member 1 (Voltage-gatedpotassium channel subunit Kv1.1) (HUKI) (HBK1).	KCNA1_438_450	DSDLSRRSSSTMS	4.26926	3.9285	4.11128	4.43195	4.51763	4.1486	4.70879	4.36484	3.57129
Potassium voltage-gated channel subfamily A member 2 (Voltage-gatedpotassium channel subunit Kv1.2) (HBK5) (NGK1) (HUKIV).	KCNA2_442_454	PDLKKSRSASTIS	6.11168	5.16993	8.77814	6.84974	6.40426	7.68187	6.66681	6.86617	7.56311
Potassium voltage-gated channel subfamily A member 3 (Voltage-gatedpotassium channel subunit Kv1.3) (HPCN3) (HGK5) (HuKIII) (HLK3).	KCNA3_461_473	EELRKARSNSTLS	5.2006	4.67616	5.03944	4.54121	4.04687	4.38191	5.11128	5.03695	4.66225
Potassium voltage-gated channel subfamily A member 6 (Voltage-gatedpotassium channel subunit Kv1.6) (HBK2).	KCNA6_504_516	ANRERRPSYLPTP	9.86524	9.09056	9.00313	9.60184	9.42852	8.64236	9.48031	9.72348	8.60579
Potassium voltage-gated channel subfamily B member 1 (Voltage-gatedpotassium channel subunit Kv2.1) (h-DRK1).	KCNB1_489_501	KWTKRTLSETSSS	5.88126	5.27489	5.27419	4.67403	5.10101	4.63512	5.01607	5.30688	4.05835
Kinesin-like protein KIF11 (Kinesin-related motor protein Eg5)(Kinesin-like spindle protein HKSP) (Thyroid receptor-interactingprotein 5) (TRIP-5) (Kinesin-like protein 1).	KIF11_919_931	LDIPTGTTPQRKS	3.51763	4.26502	4.94715	3.77987	4.35822	3.91594	3.4742	3.40394	3.39361
Kinesin-like protein KIF2C (Mitotic centromere-associated kinesin)(MCAK) (Kinesin-like protein 6).	KIF2C_105_118_S106G	EGLRSRSTRMSTVS	8.69795	7.82271	10.2941	8.75741	8.53572	9.10946	8.17021	8.22609	9.4965
Phosphorylase b kinase regulatory subunit alpha, skeletal muscleisoform (Phosphorylase kinase alpha M subunit).	KPB1_1011_1023	QVEFRRLSISAES	7.34455	6.36186	6.54937	6.85822	6.66627	6.20872	6.86384	7.01712	6.14514
Protein kinase C beta type (EC 2.7.11.13) (PKC-beta) (PKC-B).	KPCB_19_31_A25S	RFARKGSLRQKNV	7.31254	6.66305	8.46352	7.42151	7.22282	7.88264	7.08606	6.57129	7.82811
Protein kinase C beta type (EC 2.7.11.13) (PKC-beta) (PKC-B).	KPCB_626_639	AENFDRFFTRHPPV	4.55401	4.66225	5.19466	4.30963	4.04026	3.95858	4.72638	3.20282	4.63949
Ribosomal protein S6 kinase alpha-1 (S6K-alpha 1) (EC=2.7.11.1) (90 kDa ribosomal protein S6 kinase 1) (p90-RSK 1) (pp90RSK1) (p90S6K) (Ribosomal S6 kinase 1) (RSK-1) (MAP kinase-activated protein kinase 1a) (MAPKAPK1A).	KS6A1_374_386	QLFRGFSFVATGL	5.36351	5.39943	5.61415	4.69099	5.21239	5.16386	4.3489	4.99318	5.5003
Hormone-sensitive lipase (HSL) (EC=3.1.1.79).	LIPS_944_956	GFHPRRSSQGATQ	7.0167	6.23498	6.17106	6.42405	6.60132	5.89001	6.75891	6.79221	5.64277
Lamin-A/C (70 kDa lamin) (Renal carcinoma antigen NY-REN-32).	LMNA_192_204	DAENRLQTMKEEL	3.98116	4.1207	0	0	2.44701	1.43195	3.81318	3.20282	3.3192
Lamin-B1.	LMNB1_16_28	GGPTTPLSPTRLS	4.43824	2.82283	4.13317	3.28331	4.21899	4.10813	3.93029	4.1409	4.45943
Myristoylated alanine-rich C-kinase substrate (MARCKS) (Protein kinaseC substrate, 80 kDa protein, light chain) (PKCSL) (80K-L protein).	MARCS_152_164	KKKKKRFSFKKSF	5.95244	5.81946	6.62274	5.98332	6.21533	6.24614	6.03322	6.10259	6.18982
Myristoylated alanine-rich C-kinase substrate (MARCKS) (Protein kinaseC substrate, 80 kDa protein, light chain) (PKCSL) (80K-L protein).	MARCS_160_172	FKKSFKLSGFSFK	5.93297	5.39426	6.18497	5.77789	5.59175	5.72432	5.77938	5.51168	5.61415
Myelin basic protein (MBP) (Myelin A1 protein) (Myelin membraneencephalitogenic protein).	MBP_222_234	HFFKNIVTPRTPP	5.50869	5.11364	6.277	5.53065	5.36484	5.62357	5.28331	5.53417	5.75135
Mitogen-activated protein kinase 10 (EC 2.7.11.24) (Stress-activated protein kinase JNK3) (c-Jun N-terminal kinase 3) (MAP kinase p49 3F12).	MK10_214_226	AGTSFMMTPYVVT	3.89413	3.88863	1.68993	1.80346	3.81124	2.85704	3.3806	4.00679	2.33278
Dual specificity mitogen-activated protein kinase kinase 1(EC 2.7.12.2) (MAP kinase kinase 1) (MAPKK 1) (ERK activator kinase 1)(MAPK/ERK kinase 1) (MEK1).	MP2K1_281_293	GDAAETPPRPRTP	3.37799	3.72123	2.57129	3.97425	2.91954	3.03695	0.986325	3.64712	2.78778
Dual specificity mitogen-activated protein kinase kinase 1(EC 2.7.12.2) (MAP kinase kinase 1) (MAPKK 1) (ERK activator kinase 1)(MAPK/ERK kinase 1) (MEK1).	MP2K1_287_299	PPRPRTPGRPLSS	5.73663	4.9889	7.01796	6.08866	5.72638	6.24829	5.26996	4.96033	6.16955
M-phase phosphoprotein 6.	MPH6_140_152	EDENGDITPIKAK	3.89596	3.82475	0	2.23208	3.84194	2.48153	4.59513	3.74172	2.5009
M-phase inducer phosphatase 1 (EC=3.1.3.48) (Dual specificity phosphatase Cdc25A).	MPIP1_172_184	FTQRQNSAPARML	5.13394	4.40394	7.37208	5.4231	4.91142	6.41642	4.88495	4.59513	6.40297
M-phase inducer phosphatase 3 (EC 3.1.3.48) (Dual specificityphosphatase Cdc25C).	MPIP3_208_220	RSGLYRSPSMPEN	3.21459	4.17144	4.63073	0	3.89961	4.05671	2.55748	4.06324	3.86079
Myb-related protein B (B-Myb).	MYBB_513_525	DNTPHTPTPFKNA	4.22628	3.68359	2.89413	4.70671	3.36219	2.12383	4.47052	3.8923	3.4395
Myc proto-oncogene protein (c-Myc) (Transcription factor p64).	MYC_51_63	KKFELLPTPPLSP	4.13936	3.80151	2.24936	1.91594	3.62081	3.33547	1.39102	1.43195	0.811238
Myosin-binding protein C, cardiac-type (Cardiac MyBP-C) (C-protein,cardiac muscle isoform).	MYPC3_268_280	LSAFRRTSLAGGG	8.90876	7.80127	8.06304	8.65619	8.41594	7.76155	8.6397	8.60244	7.76719
Neutrophil cytosol factor 1 (NCF-1) (Neutrophil NADPH oxidase factor1) (47 kDa neutrophil oxidase factor) (p47-phox) (NCF-47K) (47 kDaautosomal chronic granulomatous disease protein) (Nox organizer 2)(Nox-organizing protein 2) (SH3 and PX domain-containing protein 1A).	NCF1_296_308	RGAPPRRSSIRNA	9.42298	8.36261	8.65396	9.4159	9.09863	8.29193	9.16728	9.12256	8.08456
Neutrophil cytosol factor 1 (NCF-1) (Neutrophil NADPH oxidase factor1) (47 kDa neutrophil oxidase factor) (p47-phox) (NCF-47K) (47 kDaautosomal chronic granulomatous disease protein) (Nox organizer 2)(Nox-organizing protein 2) (SH3 and PX domain-containing protein 1A).	NCF1_321_333	QDAYRRNSVRFLQ	7.41801	6.33581	6.13936	6.69309	6.72586	5.74375	6.87246	6.84099	5.46067
Serine/threonine-protein kinase Nek2 (EC 2.7.11.1) (NimA-relatedprotein kinase 2) (NimA-like protein kinase 1) (HSPK 21).	NEK2_172_184	FAKTFVGTPYYMS	5.48701	4.49246	5.73305	5.06974	5.10813	5.25079	5.58496	4.71606	4.9445
Serine/threonine-protein kinase Nek3 (EC 2.7.11.1) (NimA-relatedprotein kinase 3) (HSPK 36).	NEK3_158_170	FACTYVGTPYYVP	5.07298	4.7468	5.63567	4.99745	5.27278	5.19838	5.0328	4.44075	4.92492
Nuclear factor NF-kappa-B p105 subunit (DNA-binding factor KBF1) (EBP-1) [Contains: Nuclear factor NF-kappa-B p50 subunit].	NFKB1_330_342	FVQLRRKSDLETS	7.15453	6.18796	6.72045	6.84809	6.50869	6.15358	6.6574	6.32634	6.06771
Glutamate [NMDA] receptor subunit zeta-1 precursor (N-methyl-D-aspartate receptor subunit NR1).	NMDZ1_890_902	SFKRRRSSKDTST	8.54478	7.69138	9.00255	8.56303	8.27208	8.54047	8.33041	8.40201	8.37307
Nitric oxide synthase, endothelial (EC=1.14.13.39) (Endothelial NOS) (eNOS) (EC-NOS) (NOS type III) (NOSIII) (Constitutive NOS) (cNOS).	NOS3_1171_1183	SRIRTQSFSLQER	7.91142	6.93941	8.56677	8.11266	7.73611	7.84087	7.73573	7.56022	7.54966
Nuclear receptor subfamily 4 group A member 1 (Orphan nuclear receptorHMR) (Early response protein NAK1) (TR3 orphan receptor) (ST-59).	NR4A1_344_356	GRRGRLPSKPKQP	6.00425	5.29028	6.67082	5.80053	5.63183	5.93653	5.42119	5.34354	5.80444
NT-3 growth factor receptor precursor (EC 2.7.10.1) (Neurotrophictyrosine kinase receptor type 3) (TrkC tyrosine kinase) (GP145-TrkC)(Trk-C).	NTRK3_824_836	LHALGKATPIYLD	3.81124	3.26076	3.39361	3.39878	3.17295	2.79564	4.05671	2.98633	2.54354
Cellular tumor antigen p53 (Tumor suppressor p53) (Phosphoprotein p53)(Antigen NY-CO-13).	P53_12_24	PPLSQETFSDLWK	5.04851	4.70462	6.38191	5.54413	5.27841	6.12773	4.78086	4.68888	5.96426
Cellular tumor antigen p53 (Tumor suppressor p53) (Phosphoprotein p53)(Antigen NY-CO-13).	P53_308_323	LPNNTSSSPQPKKKPL	4.2565	4.03861	3.53417	4.44576	4.71087	4.31511	4.97858	3.91052	4.40007
cGMP-specific 3',5'-cyclic phosphodiesterase (EC 3.1.4.35) (CGB-PDE)(cGMP-binding cGMP-specific phosphodiesterase).	PDE5A_95_107	GTPTRKISASEFD	3.70879	3.66654	3.85704	3.76193	3.97771	3.55748	4.40651	3.20577	3.4693
3-phosphoinositide-dependent protein kinase 1 (EC 2.7.11.1) (hPDK1).	PDPK1_27_39	SMVRTQTESSTPP	4.09066	3.71087	0	2.11757	3.40394	2.81897	3.25507	3.49608	2.29445
Pleckstrin (Platelet p47 protein).	PLEK_106_118	GQKFARKSTRRSI	7.55372	6.6865	8.67363	7.90235	7.46483	7.70488	7.8671	7.92739	7.86885
Phospholemman precursor (FXYD domain-containing ion transportregulator 1).	PLM_76_88	EEGTFRSSIRRLS	6.95376	5.90825	6.81221	6.99254	6.64576	6.42056	6.57985	6.34019	6.32125
Protein phosphatase 1 regulatory subunit 1A (Protein phosphataseinhibitor 1) (IPP-1) (I-1).	PPR1A_28_40	QIRRRRPTPATLV	9.15377	8.20106	9.67725	9.5681	9.08866	9.03399	9.32918	9.06868	8.96861
DNA-dependent protein kinase catalytic subunit (DNA-PK catalytic subunit) (DNA-PKcs) (EC=2.7.11.1) (DNPK1) (p460).	PRKDC_2618_2630	TRTQEGSLSARWP	6.60775	5.865	8.51443	7.13278	6.96753	7.95836	6.87315	6.8657	8.198
Tyrosine-protein kinase 6 (EC 2.7.10.2) (Breast tumor kinase)(Tyrosine-protein kinase BRK).	PTK6_436_448	ALRERLSSFTSYE	7.43416	6.442	7.10813	7.12656	6.81946	6.87455	6.9476	7.01123	6.80078
Tyrosine-protein phosphatase non-receptor type 12 (EC 3.1.3.48)(Protein-tyrosine phosphatase G1) (PTPG1) (PTP-PEST).	PTN12_32_44	FMRLRRLSTKYRT	7.97858	7.00128	6.98804	7.85751	7.59119	6.75841	7.77578	7.56771	6.83408
Glycogen phosphorylase, liver form (EC 2.4.1.1).	PYGL_8_20	QEKRRQISIRGIV	6.40072	5.36879	6.89665	6.3192	6.01144	6.1801	5.77591	4.74579	6.43195
Ras-related protein Rab-1A (YPT1-related protein).	RAB1A_187_199	KSNVKIQSTPVKQ	4.40651	4.24075	4.74883	4.21752	3.41928	4.48761	4.11914	3.04026	3.13317
Radixin.	RADI_559_569	RDKYKTLRQIR	4.98203	4.04357	4.86079	5.51168	4.86827	4.0665	5.5277	4.97858	5.43384
RAF proto-oncogene serine/threonine-protein kinase (EC 2.7.11.1) (Raf-1) (C-RAF) (cRaf).	RAF1_253_265	QRQRSTSTPNVHM	7.79736	6.96513	9.02655	7.78642	7.46345	7.97771	7.4049	7.36583	7.94605
Ras-related protein Rap-1b precursor (GTP-binding protein smg p21B).	RAP1B_172_184	PGKARKKSSCQLL	6.1101	5.97858	7.14629	6.41865	6.61221	6.71994	6.08986	5.78926	6.34421
Retinoblastoma-like protein 2 (130 kDa retinoblastoma-associatedprotein) (p130) (PRB2) (RBR-2).	RBL2_632_644	DEICIAGSPLTPR	2.87199	3.64059	3.75791	3.442	3.66225	3.15166	1.53887	3	2.83432
Retinoblastoma-like protein 2 (130 kDa retinoblastoma-associatedprotein) (p130) (PRB2) (RBR-2).	RBL2_655_667	GLGRSITSPTTLY	5.49729	4.8209	6.3962	5.81172	5.46622	5.88587	5.58042	5.52179	5.85328
Retinoblastoma-like protein 2 (130 kDa retinoblastoma-associatedprotein) (p130) (PRB2) (RBR-2).	RBL2_959_971	DRTSRDSSPVMRS	4.20872	4.16386	3.7356	3.87013	3.14552	3.33547	3.9087	3.85704	3.22628
Retinoblastoma-associated protein (PP110) (P105-RB) (RB).	RB_242_254	AVIPINGSPRTPR	5.01102	4.98804	6.10616	5.36879	5.20945	5.98547	4.97598	5.11757	5.60019
Retinoblastoma-associated protein (PP110) (P105-RB) (RB).	RB_350_362	SFETQRTPRKSNL	3.59175	4.70775	6.05467	3.76793	3.78778	5.73969	4.54471	3.74172	5.27208
Retinoblastoma-associated protein (PP110) (P105-RB) (RB).	RB_774_786	TRPPTLSPIPHIP	3.93742	3.64059	2.49608	4.12539	2.26643	3.9983	0	2.95156	3.1207
Retinoblastoma-associated protein (PP110) (P105-RB) (RB).	RB_803_815	NIYISPLKSPYKI	5.75489	5.2756	6.81922	5.70566	5.64712	6.21423	5.43887	4.75791	6.06243
C-Rel proto-oncogene protein (C-Rel protein).	REL_260_272	KMQLRRPSDQEVS	5.74832	5.69257	5.62523	5.21899	5.22773	5.20651	5.30481	5.32261	5.19986
40S ribosomal protein S6 (Phosphoprotein NP33).	RS6_228_240	IAKRRRLSSLRAS	8.96557	8.00584	7.95035	8.85369	8.58198	7.425	8.82823	8.9049	7.45183
Ryanodine receptor 1 (Skeletal muscle-type ryanodine receptor) (RyR1)(RYR-1) (Skeletal muscle calcium release channel).	RYR1_4317_4329	VRRLRRLTAREAA	7.65605	6.85516	7.8009	7.46761	7.25383	7.23226	7.51033	7.44732	7.19634
Sodium channel protein type 7 subunit alpha (Sodium channel proteintype VII subunit alpha) (Putative voltage-gated sodium channel subunitalpha Nax) (Sodium channel protein cardiac and skeletal muscle subunitalpha).	SCN7A_898_910	KNGCRRGSSLGQI	6.88748	6.0253	6.12266	6.37897	6.28784	5.32601	6.27138	6.36351	5.49064
Src substrate protein p85 (p80) (Cortactin).	SRC8_CHICK_423_435	KTPSSPVYQDAVS	4.09704	4.13781	3.60523	3.63402	2.98289	3.42183	3.01017	2.68993	3.17897
Proto-oncogene tyrosine-protein kinase Src (EC 2.7.10.2) (p60-Src) (c-Src) (pp60c-src).	SRC_413_425	LIEDNEYTARQGA	2.70671	2.6384	1.09226	3.5033	2.34354	3.24649	4.1207	3.62743	1.26076
Serine/threonine-protein kinase 6 (EC 2.7.11.1) (Aurora kinase A)(Aurora-A) (Serine/threonine kinase 15) (Aurora/IPL1-related kinase 1)(Aurora-related kinase 1) (hARK1) (Breast tumor-amplified kinase).	STK6_283_295	SSRRTTLCGTLDY	7.45804	6.51823	8.95546	7.46668	7.07015	8.44012	7.23009	6.71813	8.21294
Stathmin-2 (Protein SCG10) (Superior cervical ganglion-10 protein).	STMN2_90_102	AAGERRKSQEAQV	5.66332	4.87106	5.15319	5.64113	5.52356	4.70879	5.47543	5.11286	4.67189
Microtubule-associated protein tau (Neurofibrillary tangle protein)(Paired helical filament-tau) (PHF-tau).	TAU_524_536	GSRSRTPSLPTPP	4.77193	3.20577	5.05344	4.46684	4.61082	4.56785	3.8305	4.04522	4.19541
Transducin-like enhancer protein 2 (ESG2).	TLE2_246_258	EPPSPATTPCGKV	4.05671	4.01523	3.66225	3.4495	3.41419	3.06324	5.0278	4.48883	2.311
DNA topoisomerase 2-alpha (EC=5.99.1.3) (DNA topoisomerase II, alpha isozyme).	TOP2A_1463_1475	RRKRKPSTSDDSD	9.1286	8.55784	9.32133	8.9992	8.80814	9.02383	8.8927	8.67323	8.97652
Tyrosine 3-monooxygenase (EC 1.14.16.2) (Tyrosine 3-hydroxylase) (TH).	TY3H_65_77	FIGRRQSLIEDAR	7.8963	6.952	8.03363	7.47298	7.31852	7.70436	7.27595	7.4196	7.70931
Vasodilator-stimulated phosphoprotein (VASP).	VASP_150_162	EHIERRVSNAGGP	7.01228	6.39975	5.82427	6.38647	6.25899	5.74121	6.41578	6.49125	5.4619
Vasodilator-stimulated phosphoprotein (VASP).	VASP_232_244	GAKLRKVSKQEEA	4.43447	5.36748	4.82186	4.79956	4.4656	4.37799	4.82571	4.60635	4.01691
Vasodilator-stimulated phosphoprotein (VASP).	VASP_271_283	LARRRKATQVGEK	7.3504	6.46807	7.50225	7.61443	7.17163	6.9121	7.34371	7.07075	7.02884
Vigilin (High density lipoprotein-binding protein) (HDL-bindingprotein).	VIGLN_289_301	EEKKKKTTTIAVE	4.62963	4.75891	4.5667	4.533	4.90144	4.28051	4.03695	4.46437	4.05835
Vitronectin precursor (Serum-spreading factor) (S-protein) (V75)[Contains: Vitronectin V65 subunit; Vitronectin V10 subunit;Somatomedin-B].	VTNC_390_402	NQNSRRPSRATWL	7.89287	6.98246	7.28993	7.51733	7.25383	6.96753	7.37979	7.45959	6.66063
65 kDa Yes-associated protein (YAP65).	YAP1_121_133	QHVRAHSSPASLQ	5.25721	4.51168	4.81318	4.44576	5.05671	4.69939	3.89413	4.07943	4.11914
Tyrosine 3-monooxygenase (EC 1.14.16.2) (Tyrosine 3-hydroxylase) (TH).	pTY3H_64_78	RFIGRRQ(pS)LIEDARK	10.222	10.112	11.7102	10.5686	10.4058	11.4395	10.5205	10.6596	11.5732
Vasodilator-stimulated phosphoprotein (VASP).	pVASP_150_164	EHIERRV(pS)NAGGPPA	8.78056	8.6547	9.73602	8.89916	8.98262	9.53791	9.01859	8.83086	9.64559
